# Supplementary material for: Chlorinated Enyne Fatty Acid Amides from a Marine Cyanobacterium: Discovery of Taveuniamides L-M and Pharmacological Characterization of Taveuniamide F as a GPCR Antagonist with CNR1 Selectivity
Source: MDPI journal article supplement (doi:10.3390/md22010028), 2023-12-30
Supplement: s1 [file s1]

## Supplementary Materials

# Chlorinated Enyne Fatty Acid Amides from a Marine Cyanobacterium: Discovery of Taveuniamides L-M and Pharmacological Characterization of Taveuniamide F as a GPCR Antagonist with CNR1 Selectivity

Lobna A. Elsadek <sup>1,2</sup>, Emma K. Ellis <sup>1,2</sup>, Gustavo Seabra <sup>1,2</sup>, Valerie J. Paul <sup>3</sup> and Hendrik Luesch <sup>1,2\*</sup>

1 Department of Medicinal Chemistry, University of Florida, 1345 Center Drive, Gainesville, Florida 32610, United States

2 Center for Natural Products, Drug Discovery and Development (CNPd3), University of Florida, 1345 Center Drive, Gainesville, Florida 32610, United States

3 Smithsonian Marine Station at Ft. Pierce, 701 Seaway Drive, Ft. Pierce, Florida 34949, United States

\* Correspondence: luesch@cop.ufl.edu

Figure S1: Structurally related analogs in the literature

Figure S2: <sup>1</sup>H NMR (600 MHz, CDCl<sub>3</sub>) of taveuniamide L (**1**)

Figure S3: HSQC (600 MHz, CDCl<sub>3</sub>) of taveuniamide L (**1**)

Figure S4: COSY (600 MHz, CDCl<sub>3</sub>) of taveuniamide L (**1**)

Figure S5: HMBC (600 MHz, CDCl<sub>3</sub>) of taveuniamide L (**1**). The number of increments = 320

Figure S6: HMBC (600 MHz, CDCl<sub>3</sub>) of taveuniamide L (**1**). The number of increments = 512

Figure S7: <sup>1</sup>H NMR (600 MHz, CDCl<sub>3</sub>) of taveuniamide M (**2**)

Figure S8: HSQC (600 MHz, CDCl<sub>3</sub>) of taveuniamide M (**2**)

Figure S9: COSY (600 MHz, CDCl<sub>3</sub>) of taveuniamide M (**2**)

Figure S10: HMBC (600 MHz, CDCl<sub>3</sub>) of taveuniamide M (**2**)

Figure S11: <sup>1</sup>H NMR (600 MHz, CDCl<sub>3</sub>) of taveuniamide N (**3**)

Figure S12: HSQC (600 MHz, CDCl<sub>3</sub>) of taveuniamide N (**3**)

Figure S13: COSY (600 MHz, CDCl<sub>3</sub>) of taveuniamide N (**3**)

Figure S14: HMBC (600 MHz, CDCl<sub>3</sub>) of taveuniamide N (**3**)

Figure S15: <sup>1</sup>H NMR (600 MHz, CDCl<sub>3</sub>) of taveuniamide F (**4**)

Figure S16: HSQC (600 MHz, CDCl<sub>3</sub>) of taveuniamide F (**4**)

Figure S17: COSY (600 MHz, CDCl<sub>3</sub>) of taveuniamide F (**4**)

Figure S18: HMBC (600 MHz, CDCl<sub>3</sub>) of taveuniamide F (**4**)

Figure S19. <sup>1</sup>H NMR (600 MHz, CDCl<sub>3</sub>) of (*S*)-MTPA amide (**6a**) and (*R*)-MTPA amide (**6b**)

Figure S20. COSY (600 MHz, CDCl<sub>3</sub>) of the (*S*)-MTPA amide (**6a**)

Figure S21. COSY (600 MHz, CDCl<sub>3</sub>) of the (*R*)-MTPAamide (**6b**)

Figure S22. 1D TOCSY irradiating H-5 of the (*S*)-MTPA amide (**6a**) at 80 ms, 60 ms, 45 ms, 30 ms, and 15 ms

Figure S23. 1D TOCSY irradiating H-5 of the (*R*)-MTPA amide (**6b**) at 80 ms, 60 ms, 45 ms, 30 ms, and 15 ms

Figure S24. Results of DFT coordinate scan for the preferred configuration at the amide bond of the (*R*)-MTPA derivative of taveuniamide F

Figure S25: Results of taveuniamide F (**4**) in GPCR MAX Panel Primary screen ( $\beta$ -arrestin) at 20  $\mu$ M in agonist and antagonist mode

Figure S26: Cell viability assay of taveuniamide F using HEK293 cells

Figure S27: Docking poses obtained for taranabant

Supplementary References

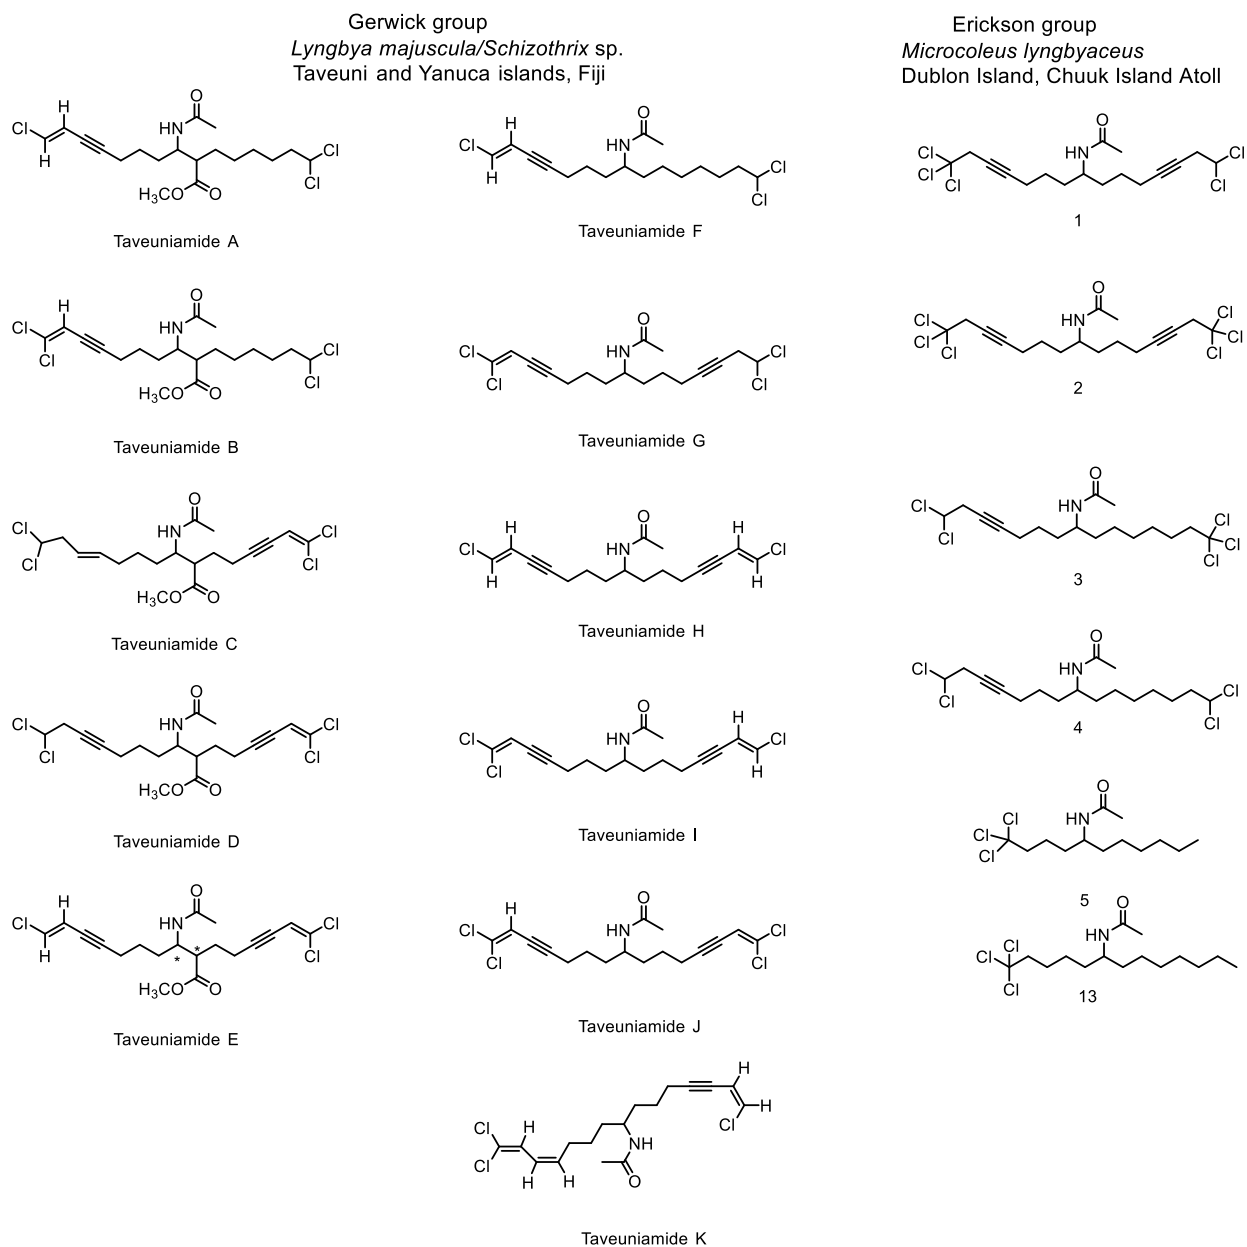

**Figure S1.** Structurally related analogs of taveuniamides in the literature.<sup>1,2</sup> The relative configuration of taveuniamide E was determined by the Gerwick group.<sup>1</sup>

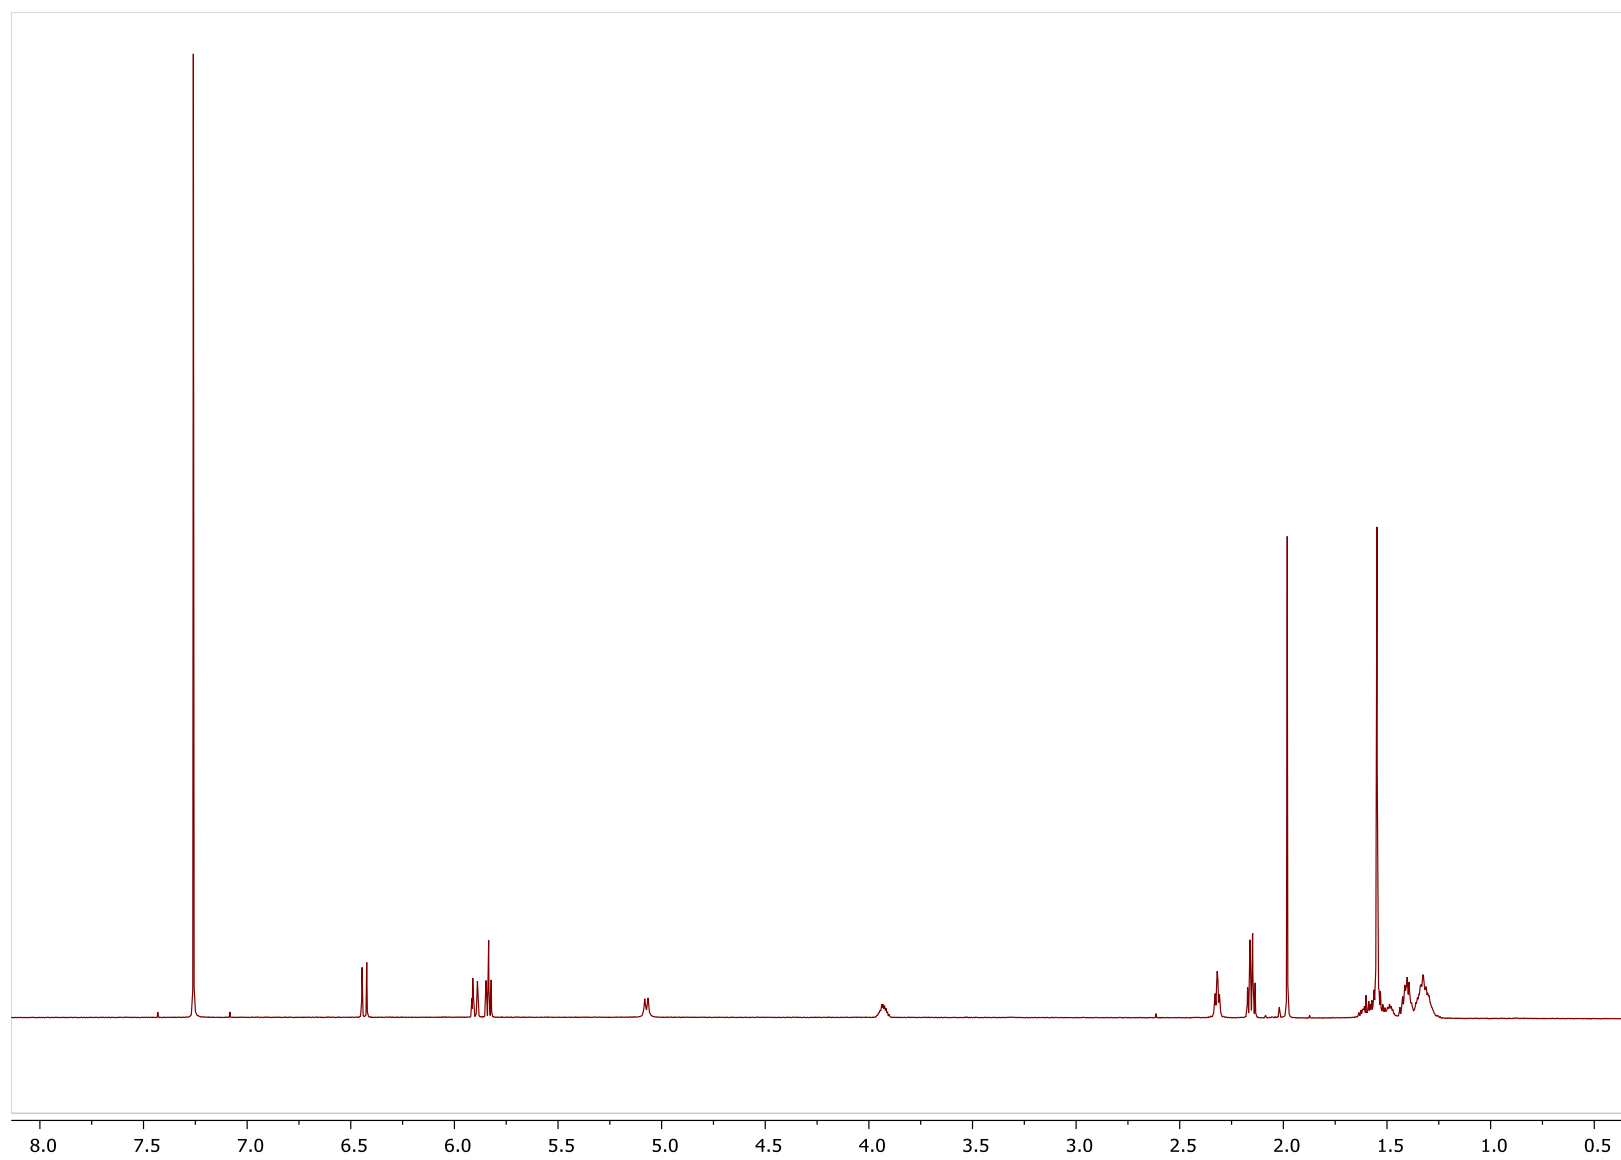

**Figure S2:**  $^1\text{H}$  NMR (600 MHz,  $\text{CDCl}_3$ ) of taveuniamide L (**1**).

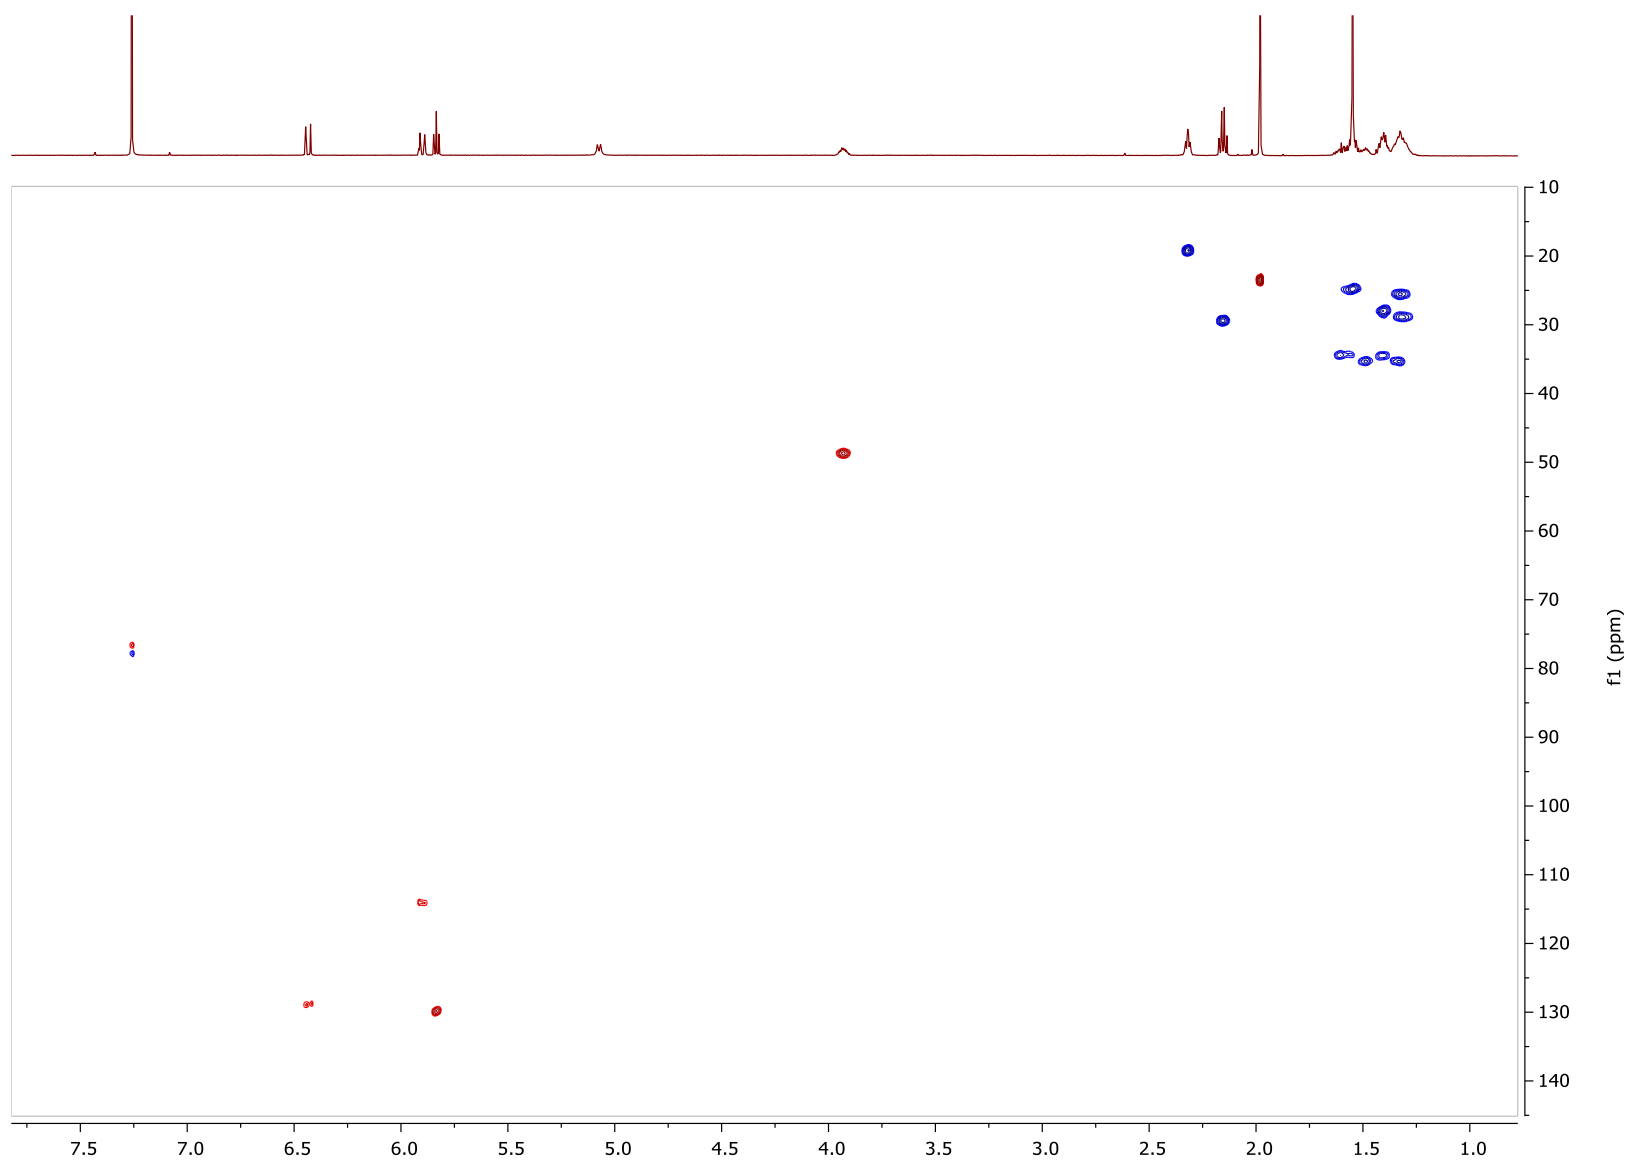

**Figure S3:** HSQC (600 MHz,  $\text{CDCl}_3$ ) of taveuniamide L (1).

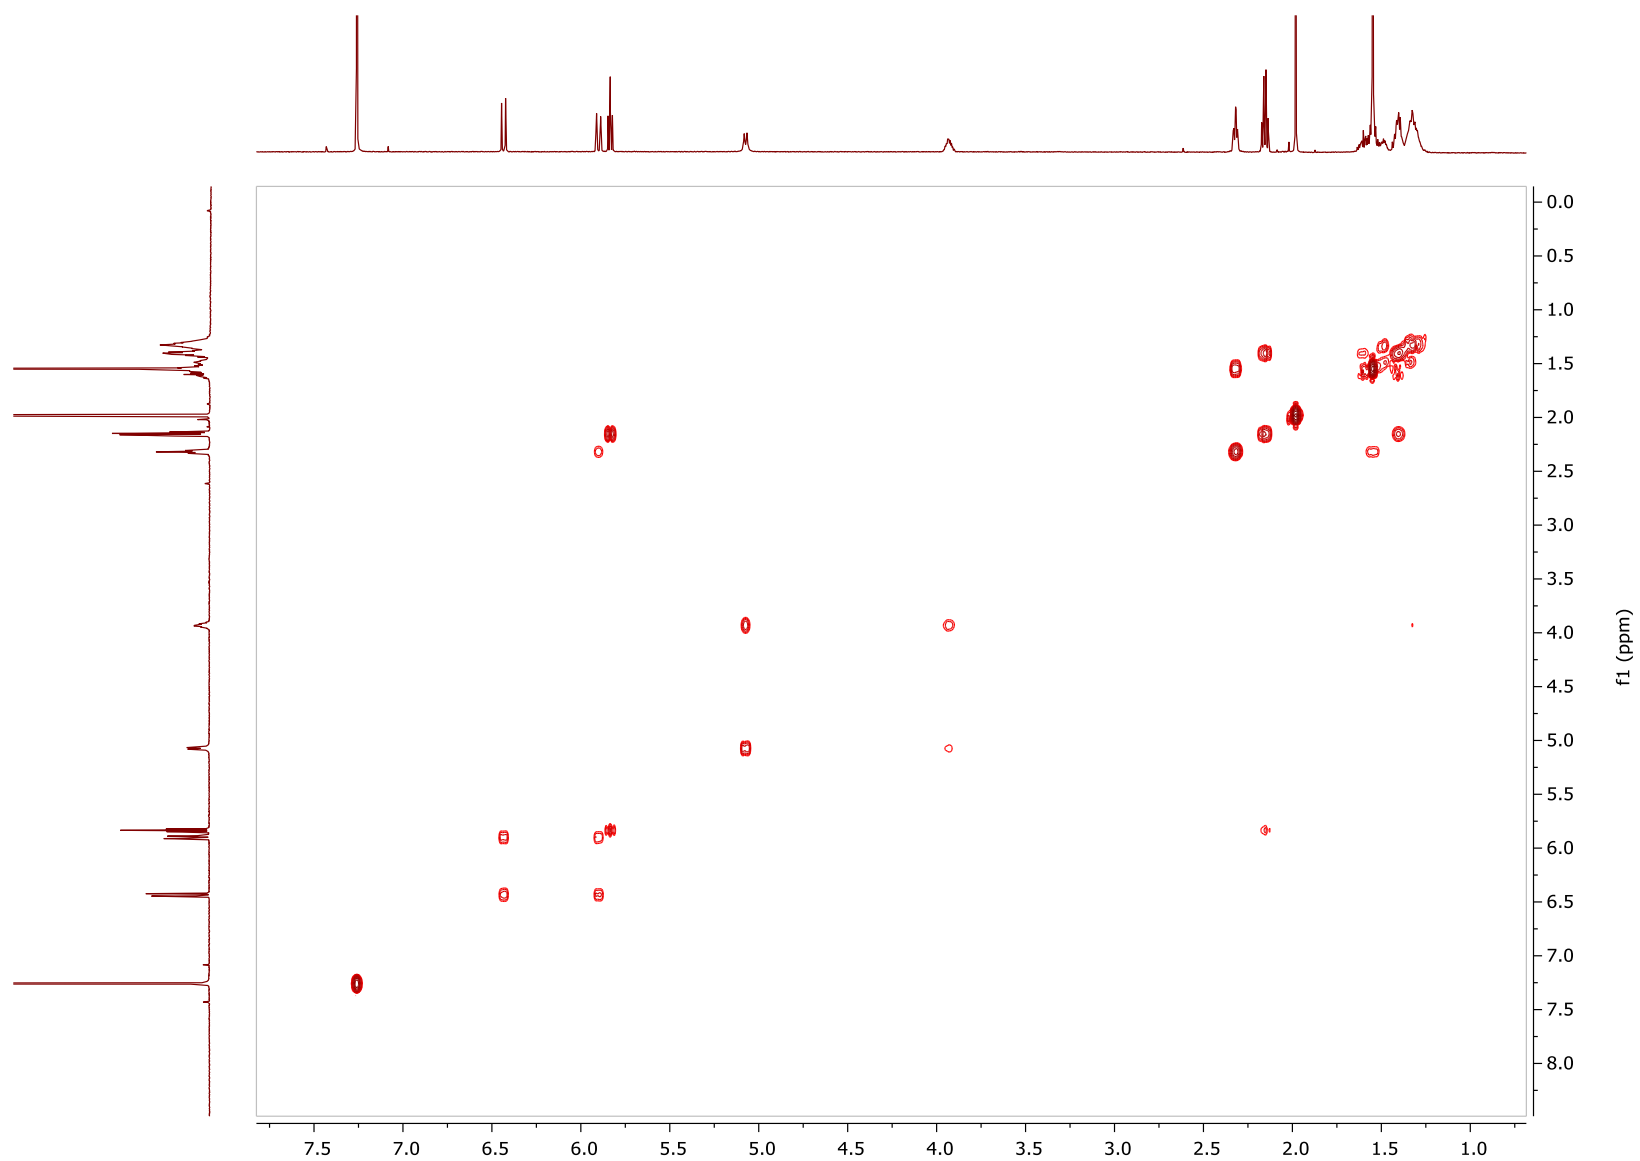

**Figure S4:** COSY (600 MHz,  $\text{CDCl}_3$ ) of taveuniamide L (**1**).

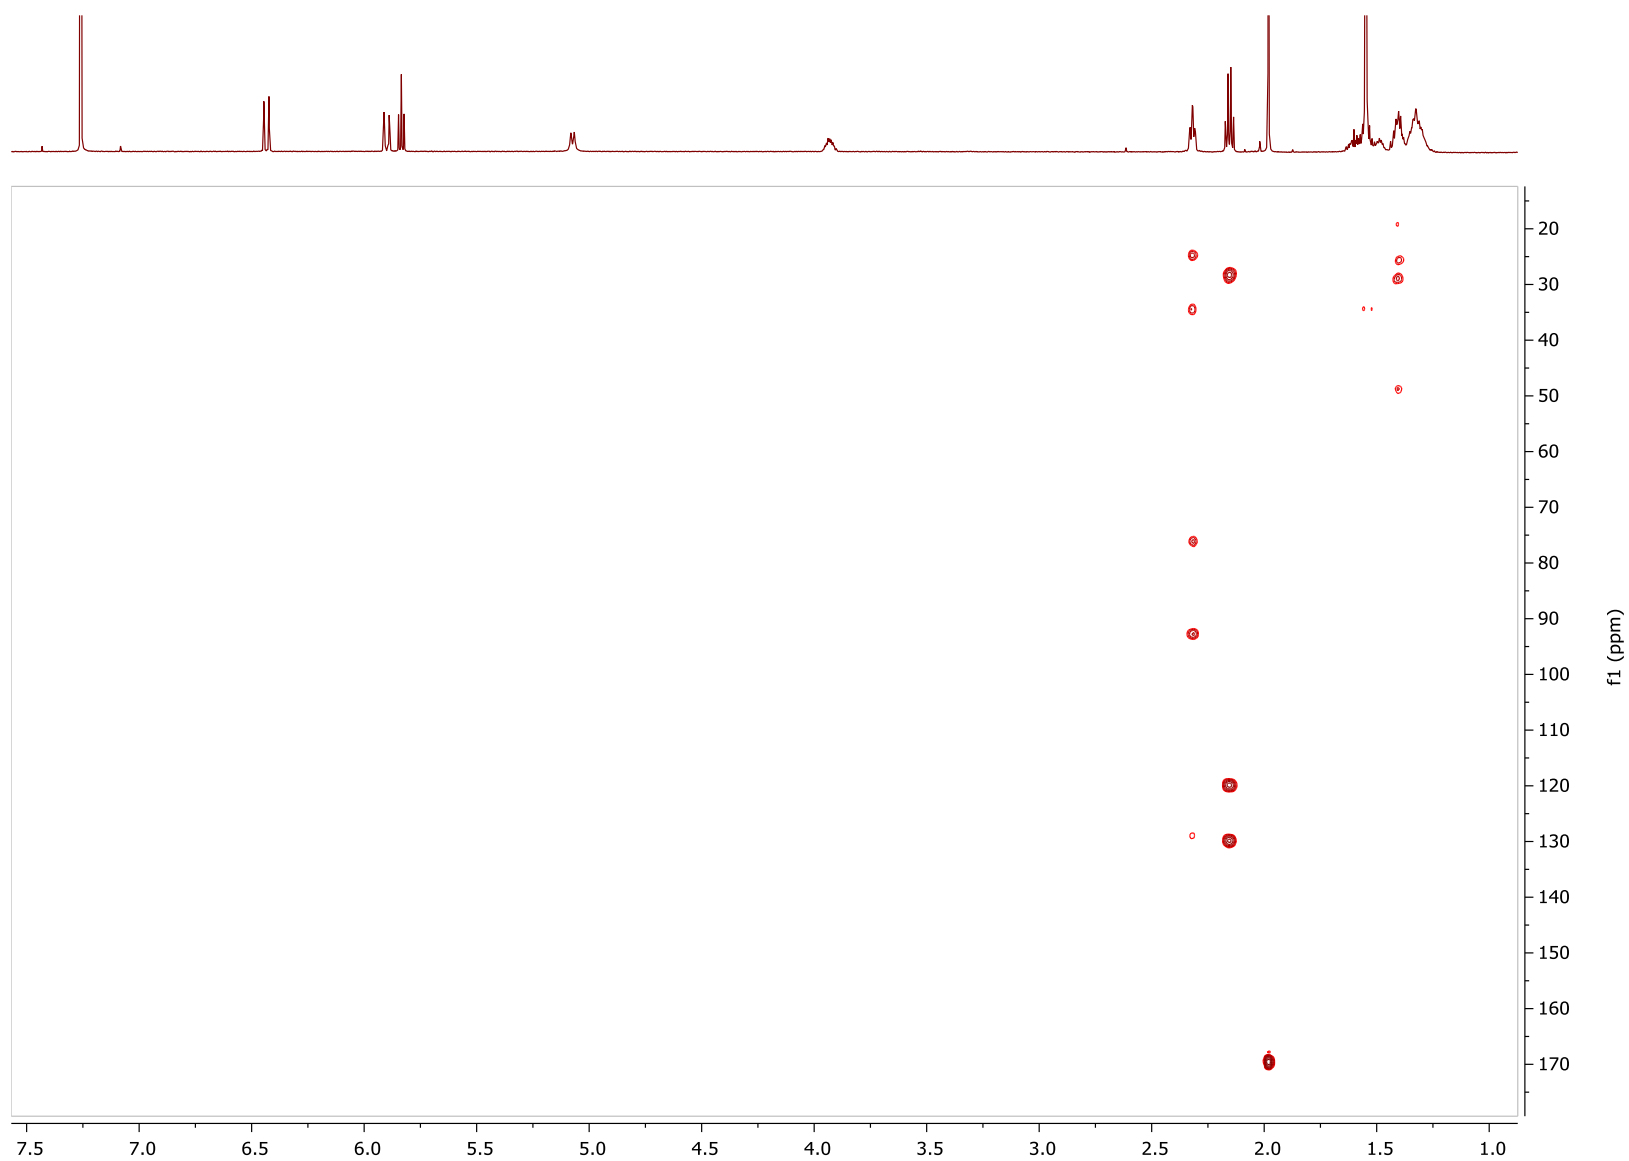

**Figure S5:** HMBC (600 MHz,  $\text{CDCl}_3$ ) of taveuniamide L (**1**). The number of increments = 320

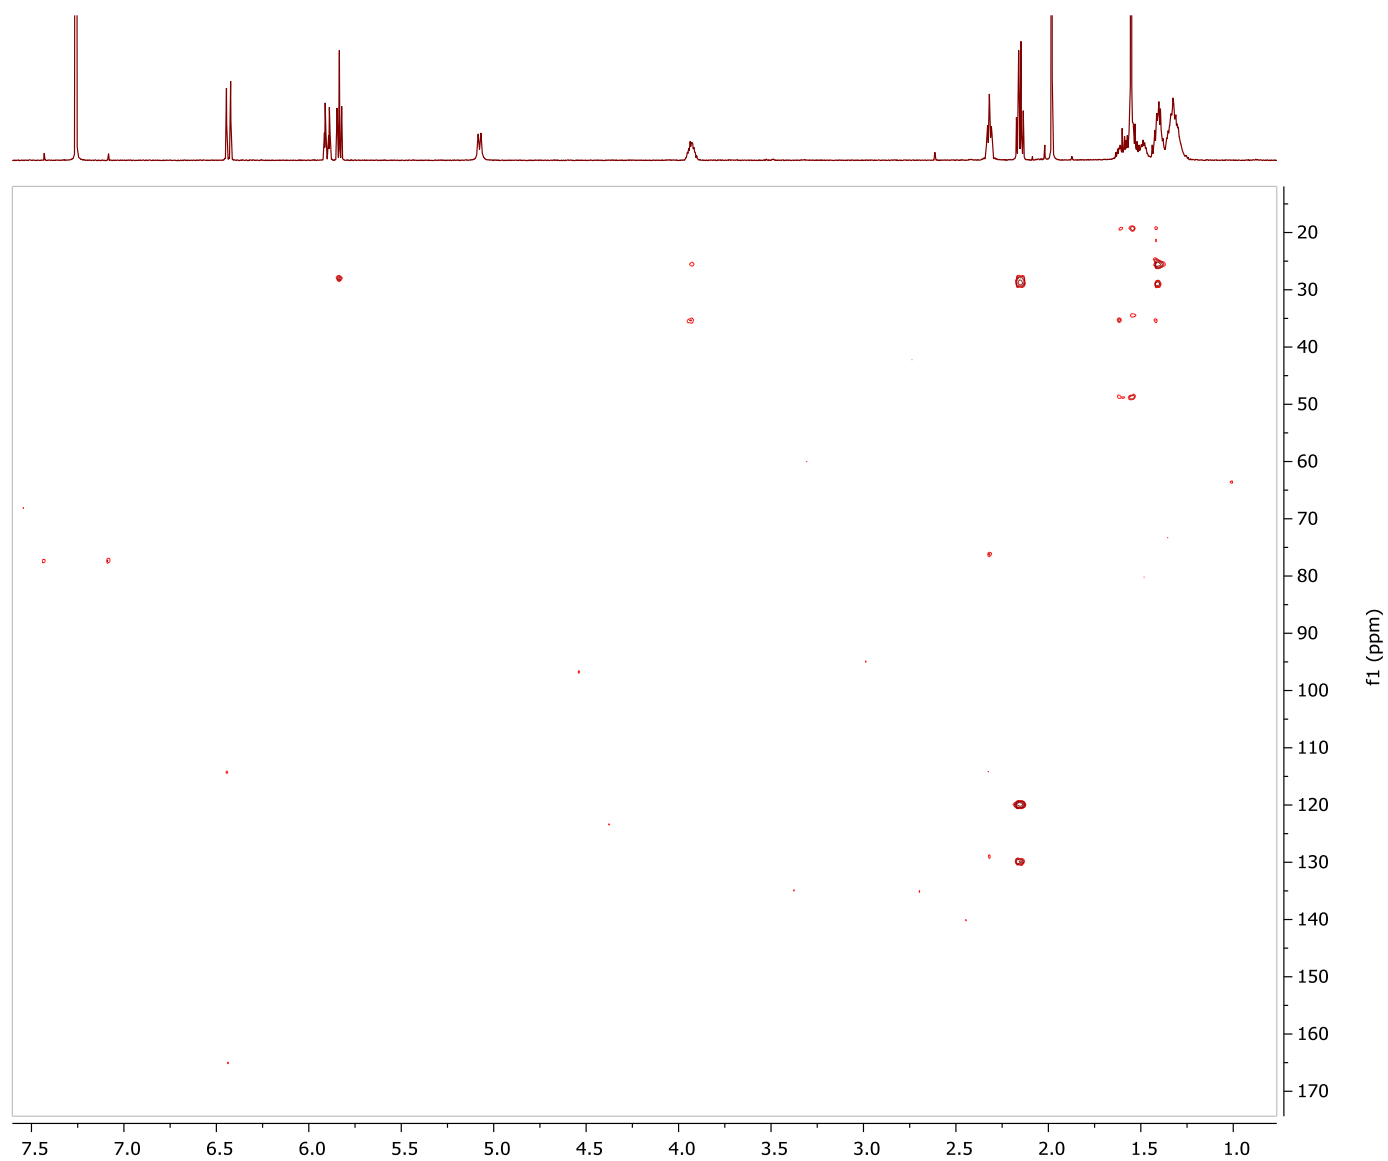

**Figure S6:** HMBC (600 MHz, CDCl<sub>3</sub>) of taveuniamide L (**1**). The number of increments = 512.



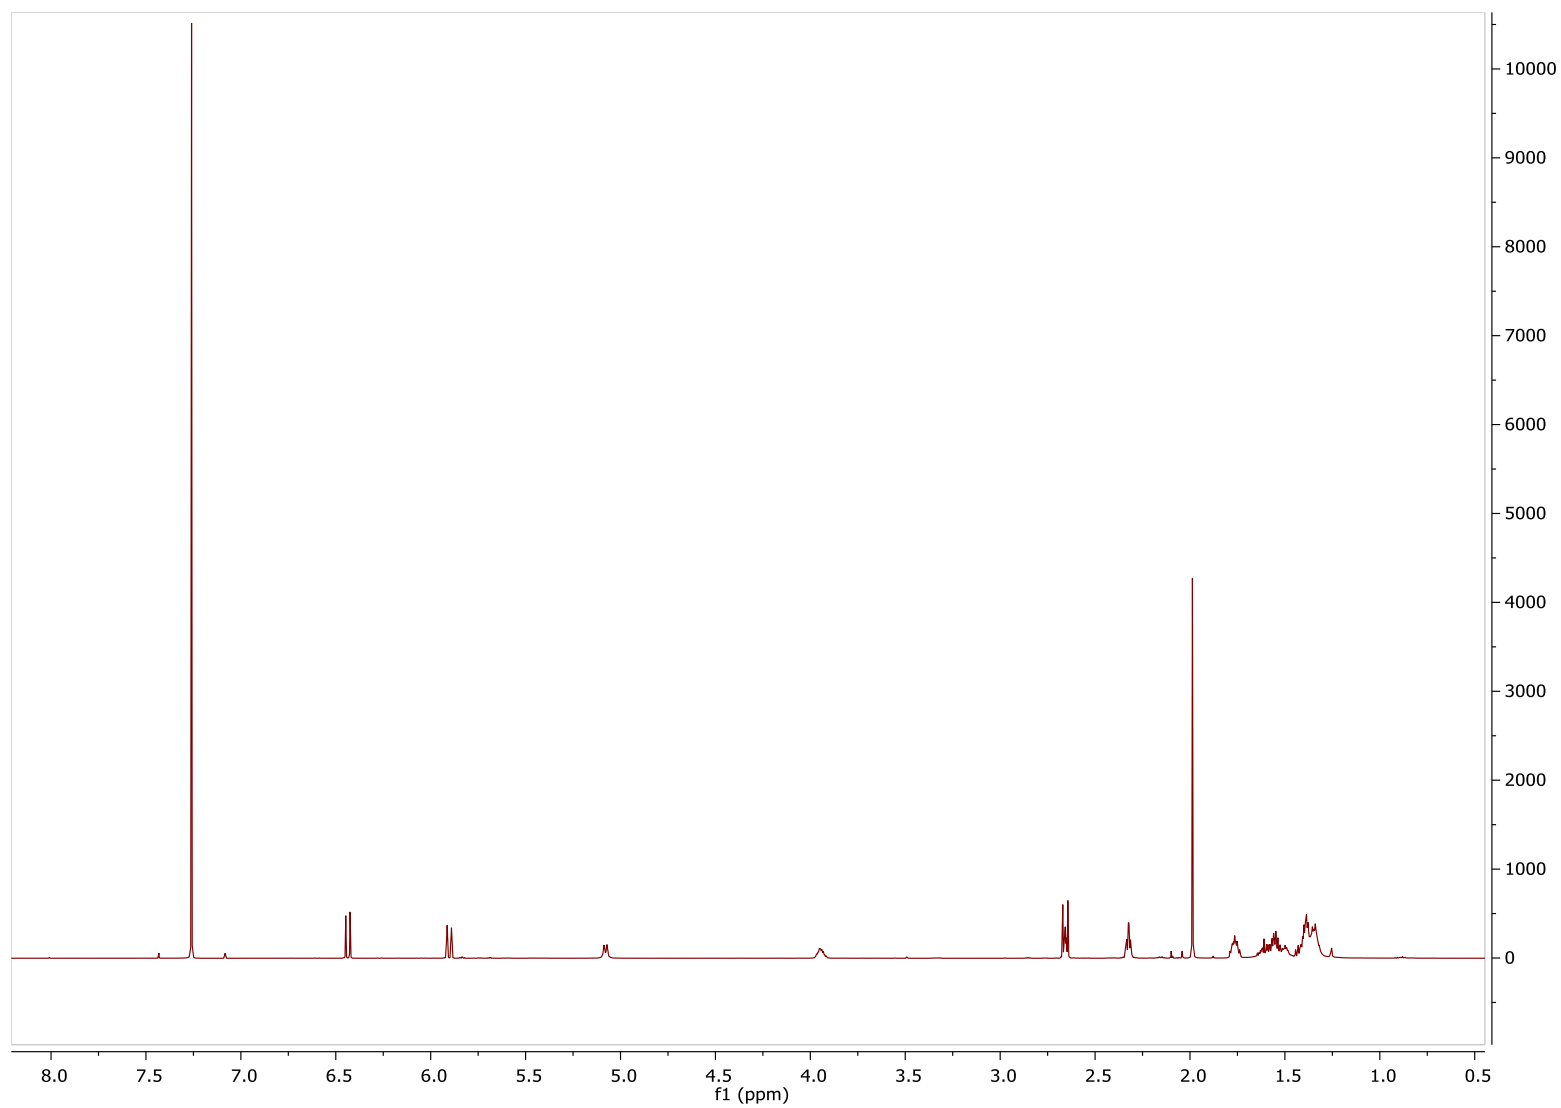

**Figure S7:**  $^1\text{H}$  NMR (600 MHz,  $\text{CDCl}_3$ ) of taveuniamide M (**2**).

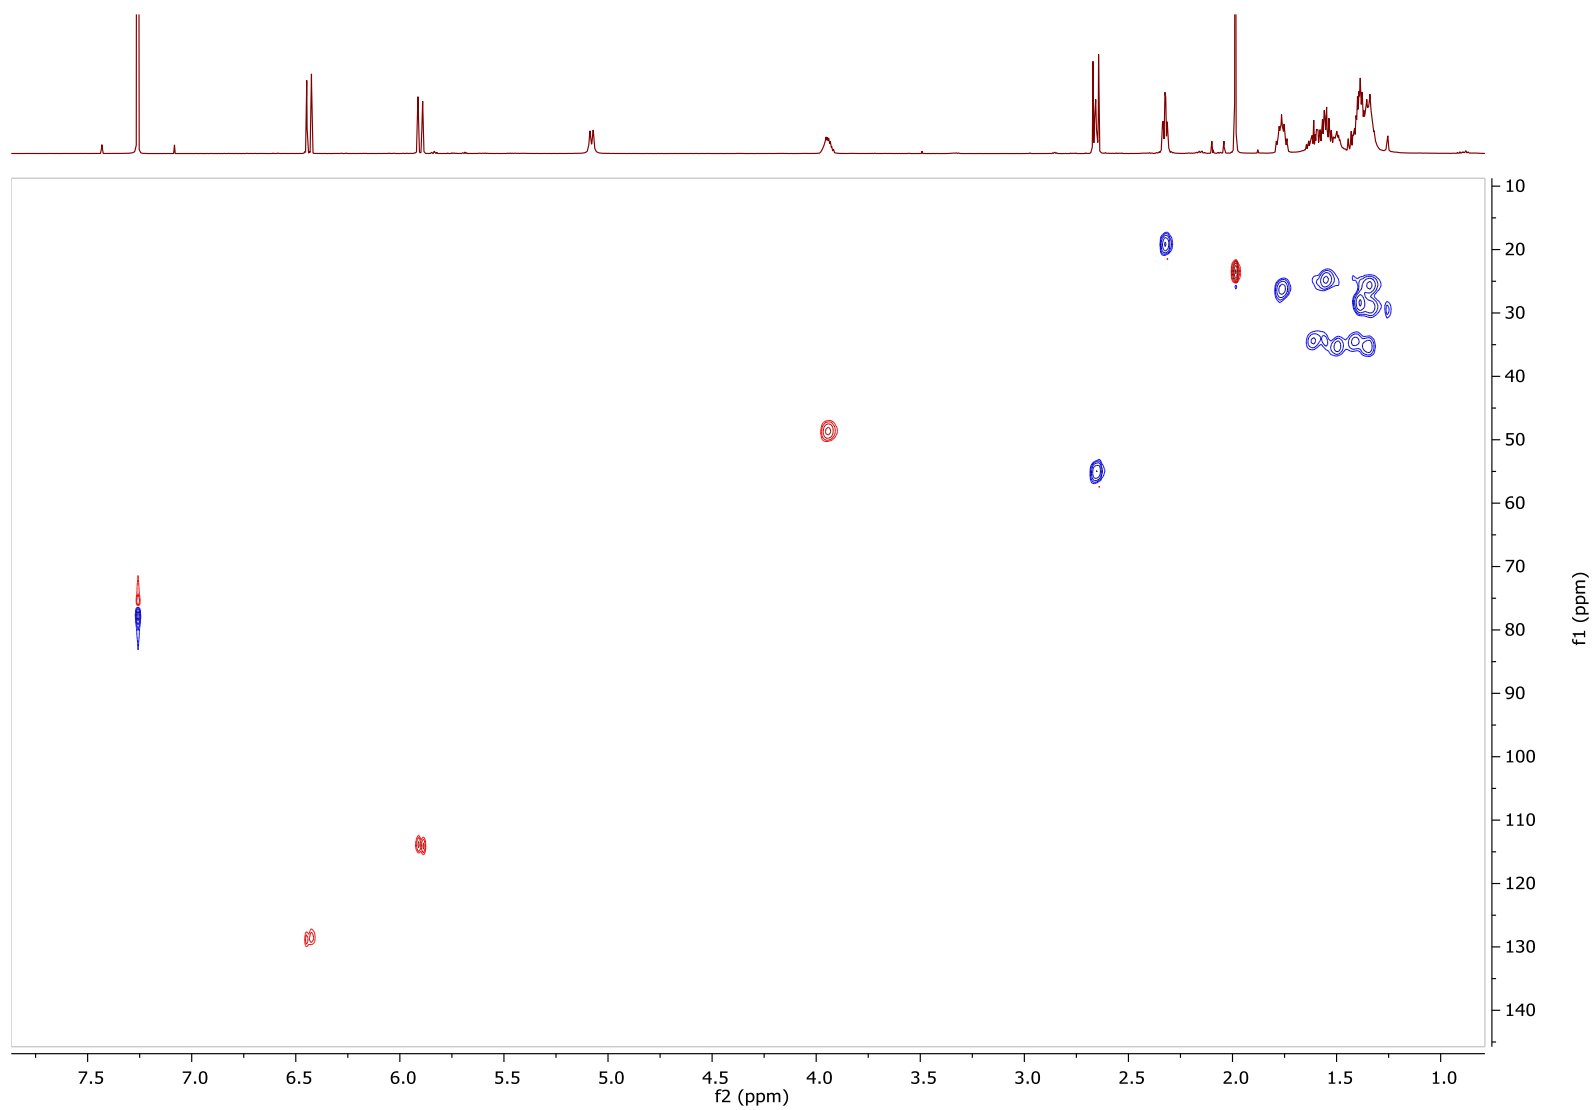

**Figure S8:** HSQC (600 MHz,  $\text{CDCl}_3$ ) of taveuniamide M (**2**).

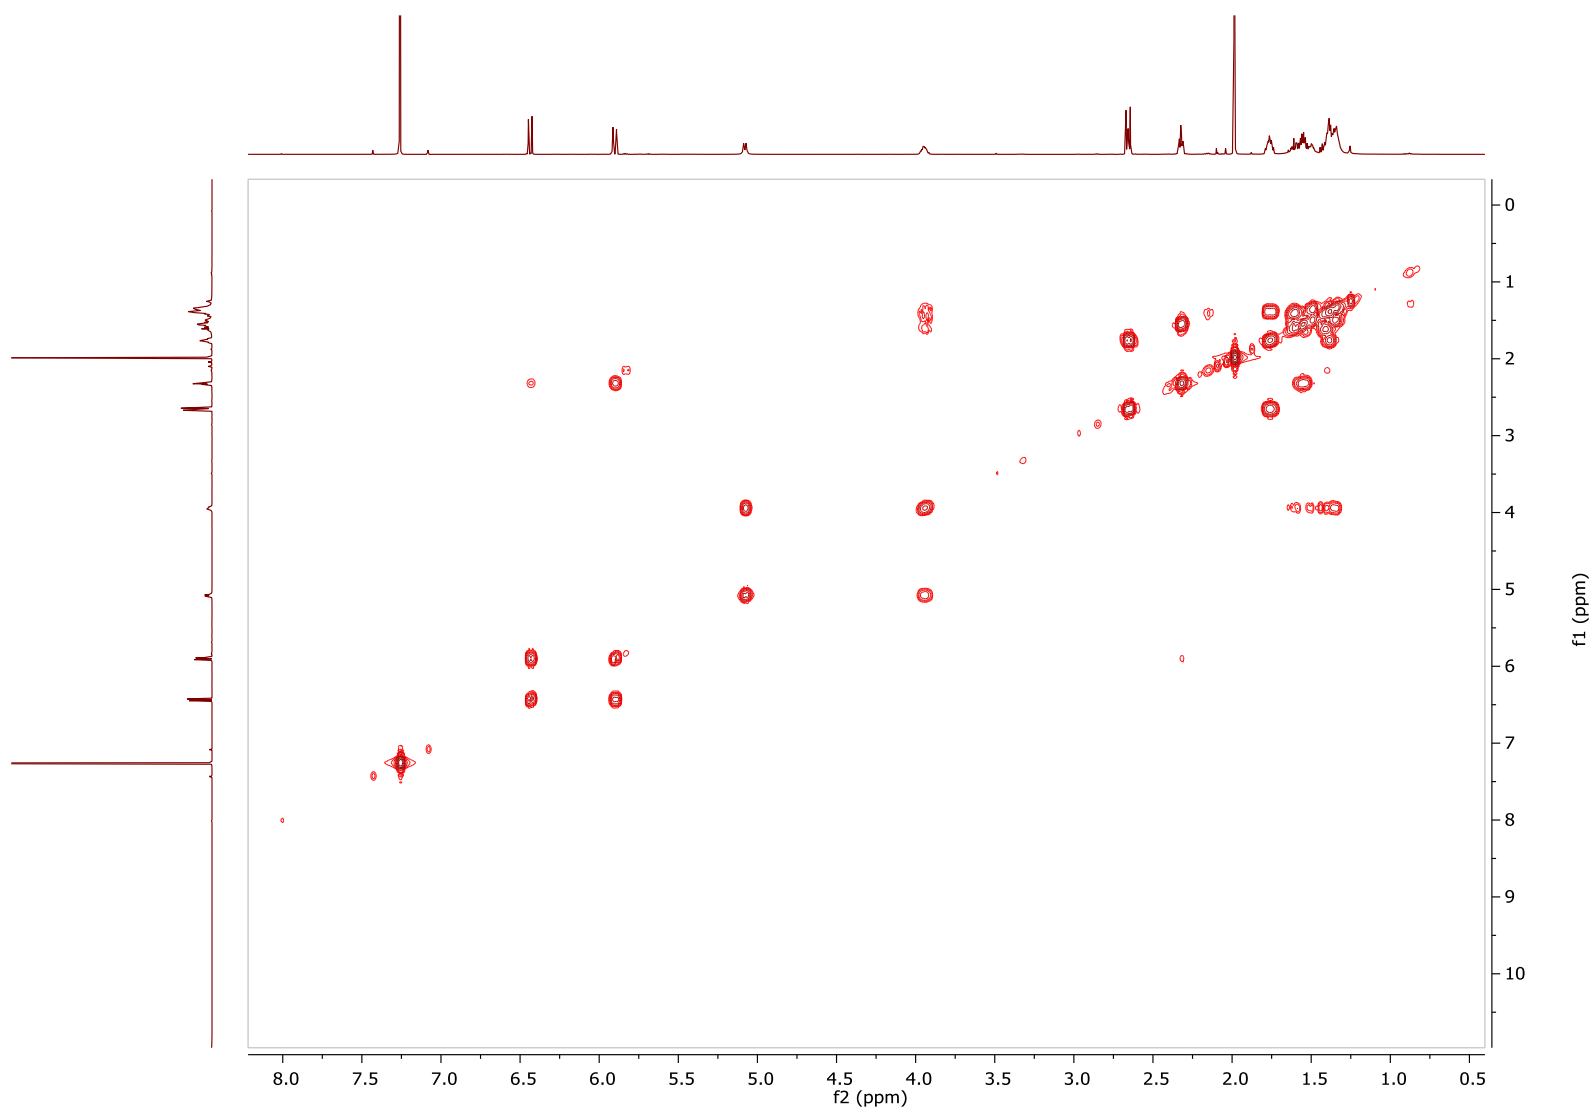

**Figure S9:** COSY (600 MHz, CDCl<sub>3</sub>) of taveuniamide M (**2**).

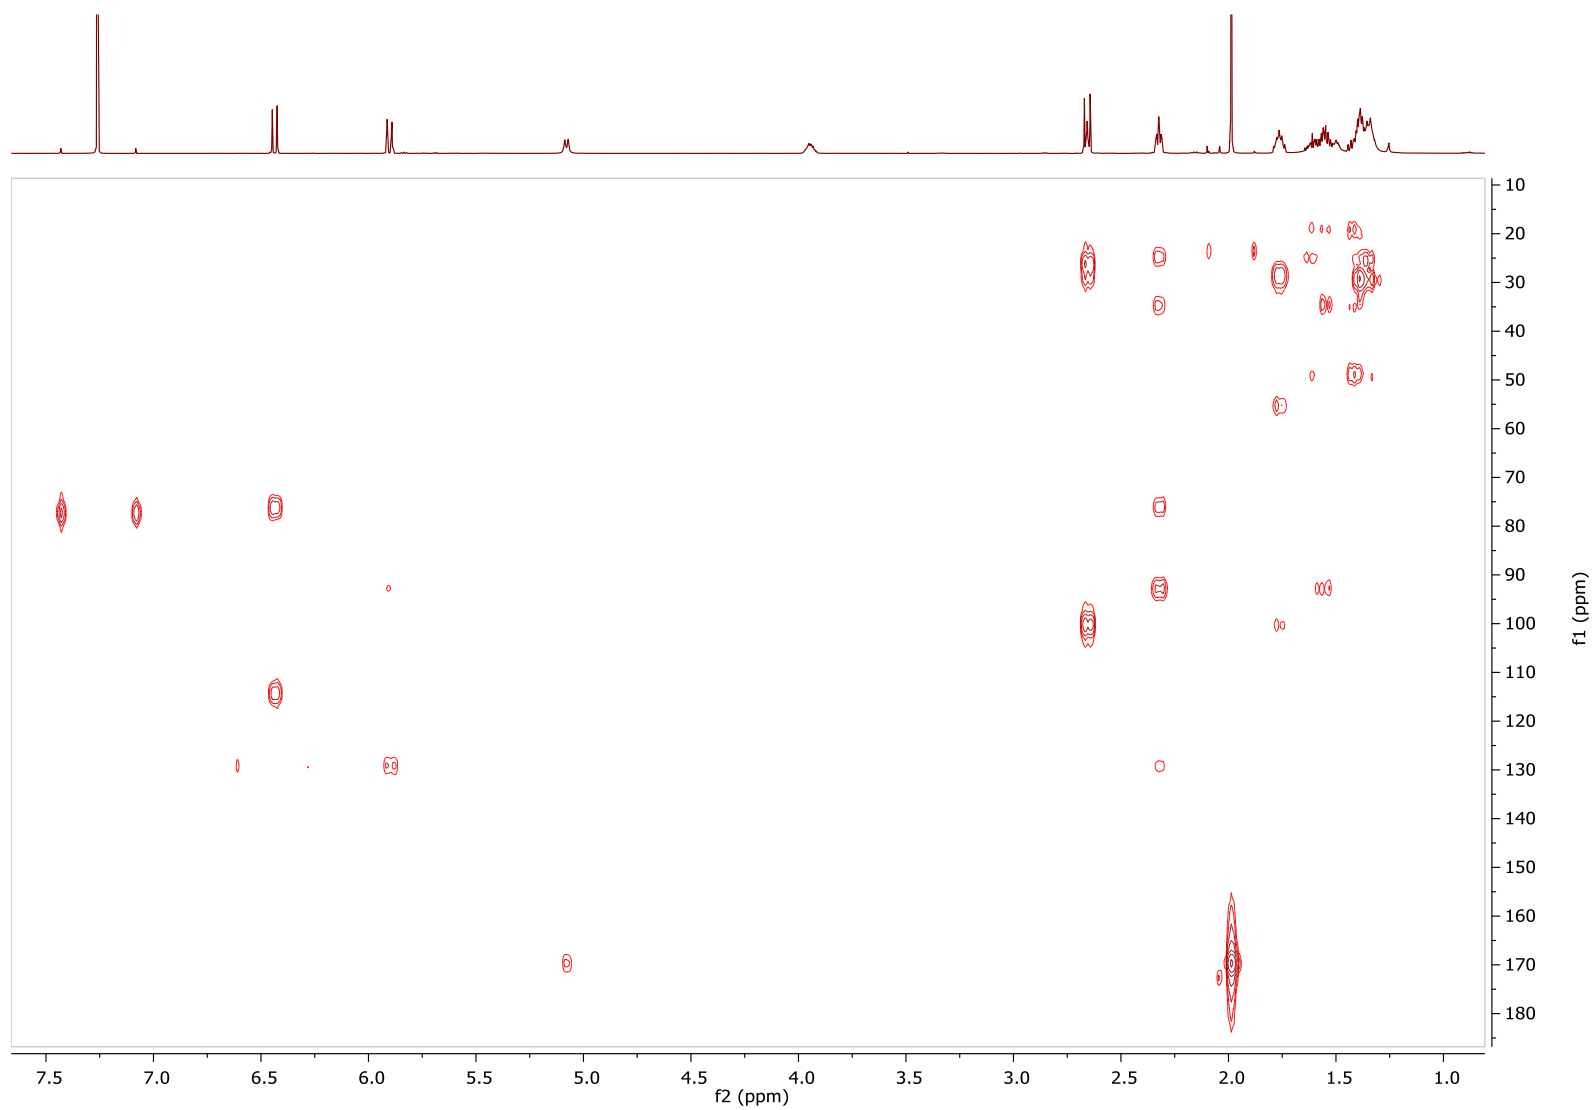

**Figure S10:** HMBC (600 MHz,  $\text{CDCl}_3$ ) of taveuniamide M (**2**).

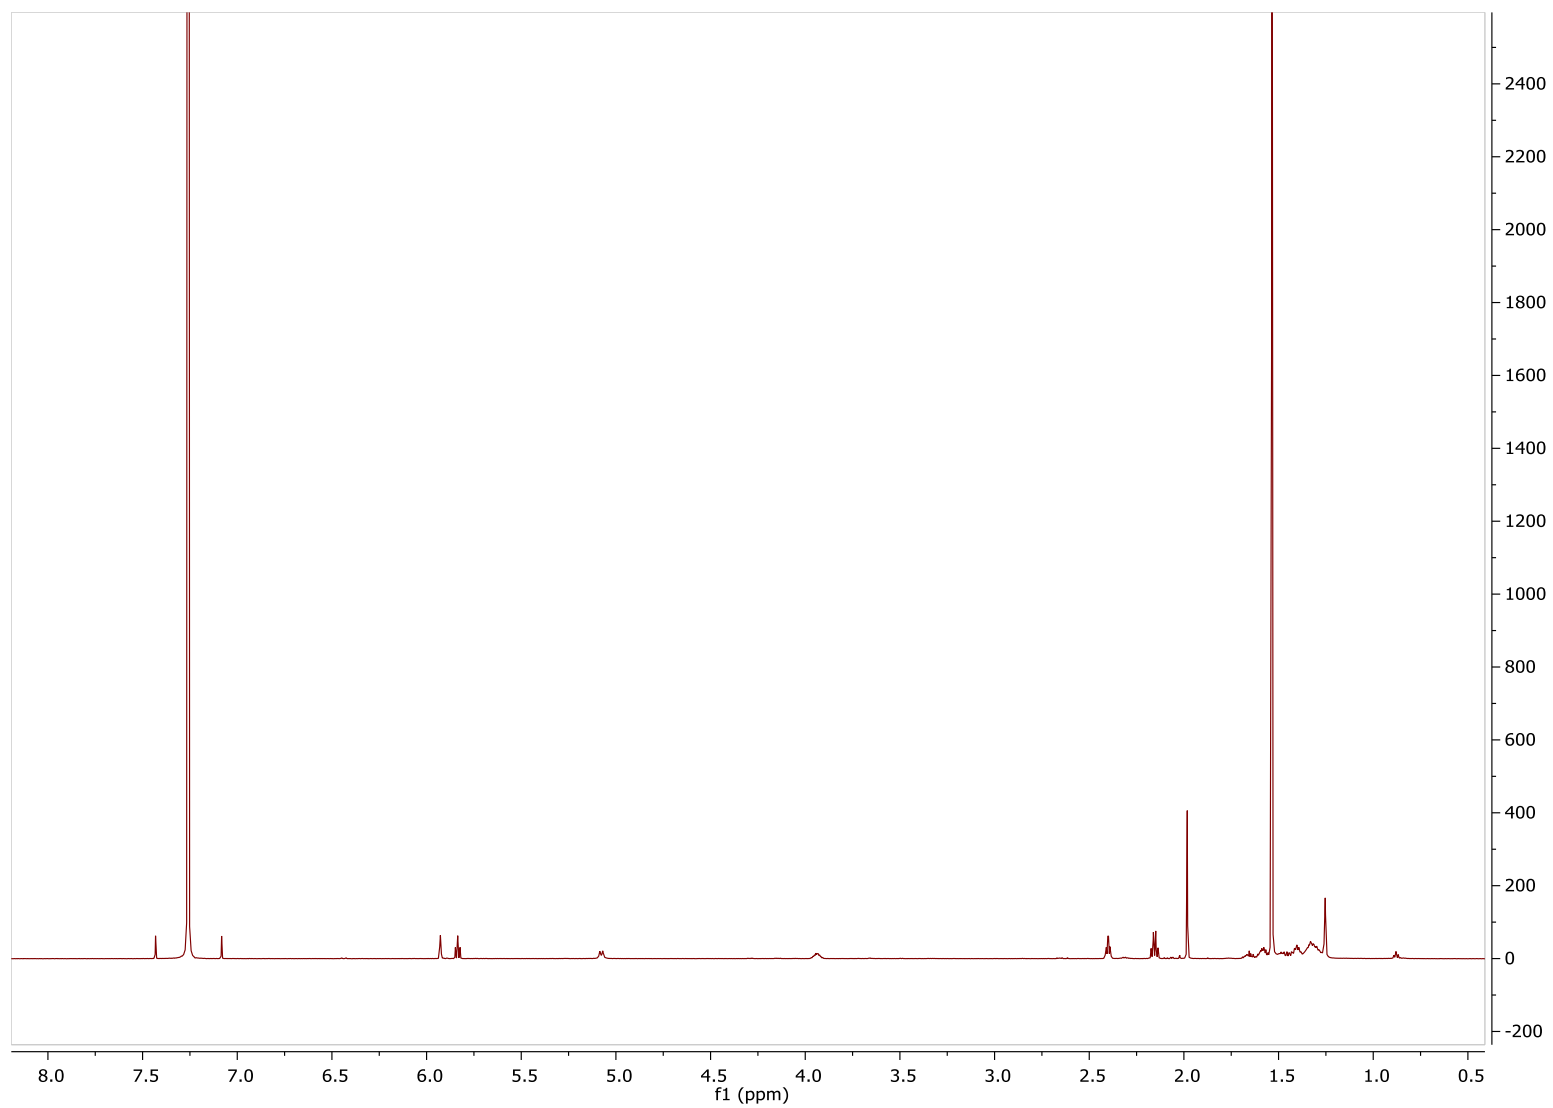

**Figure S11:**  $^1\text{H}$  NMR (600 MHz,  $\text{CDCl}_3$ ) of taveuniamide N (**3**).

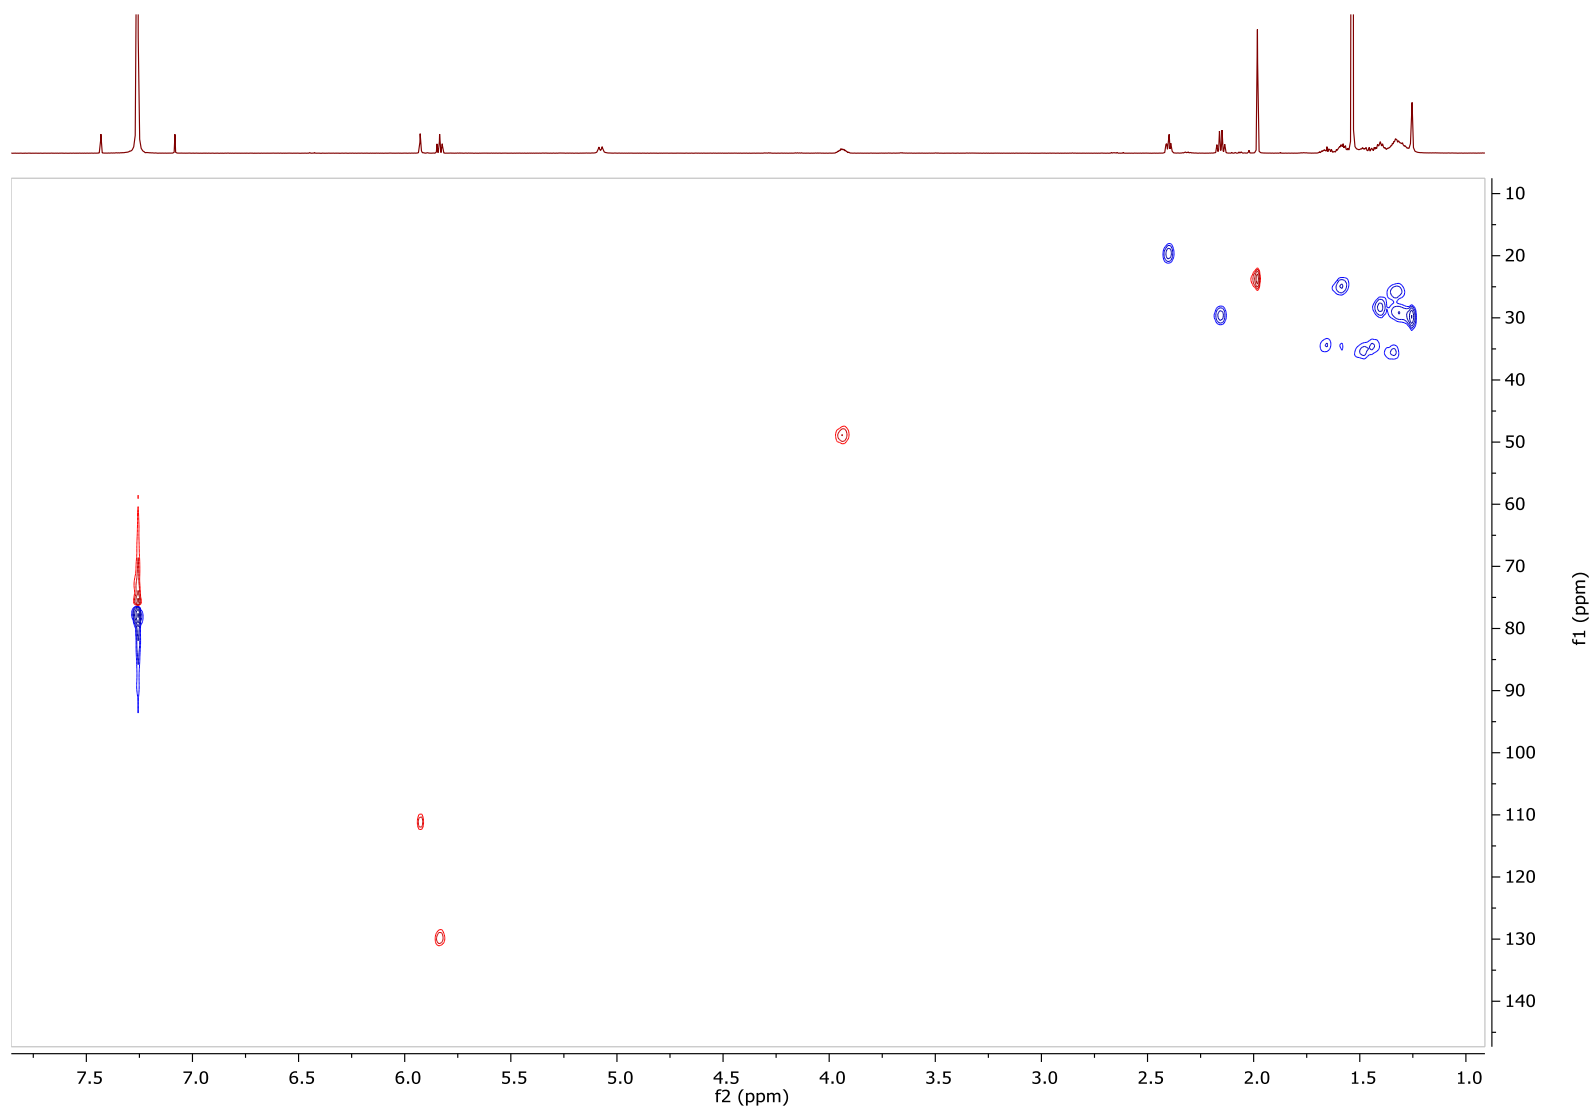

**Figure S12:** HSQC (600 MHz,  $\text{CDCl}_3$ ) of taveuniamide N (**3**).

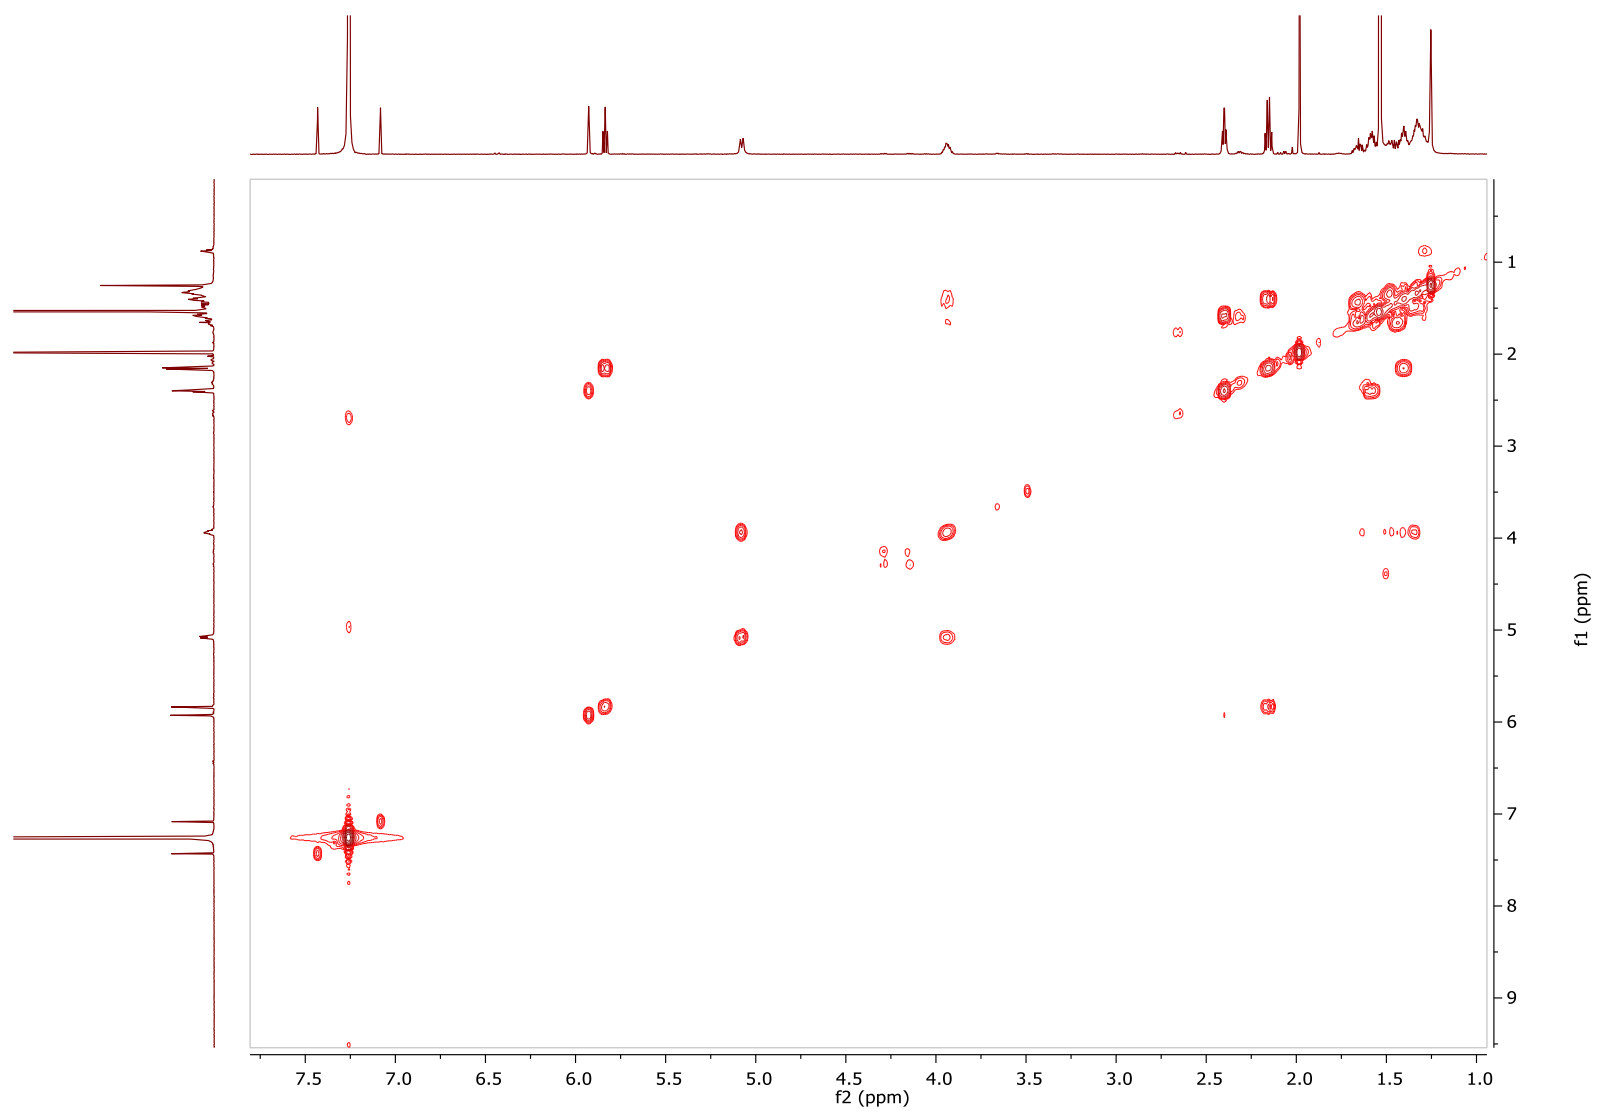

**Figure S13:** COSY (600 MHz, CDCl<sub>3</sub>) of taveuniamide N (**3**).

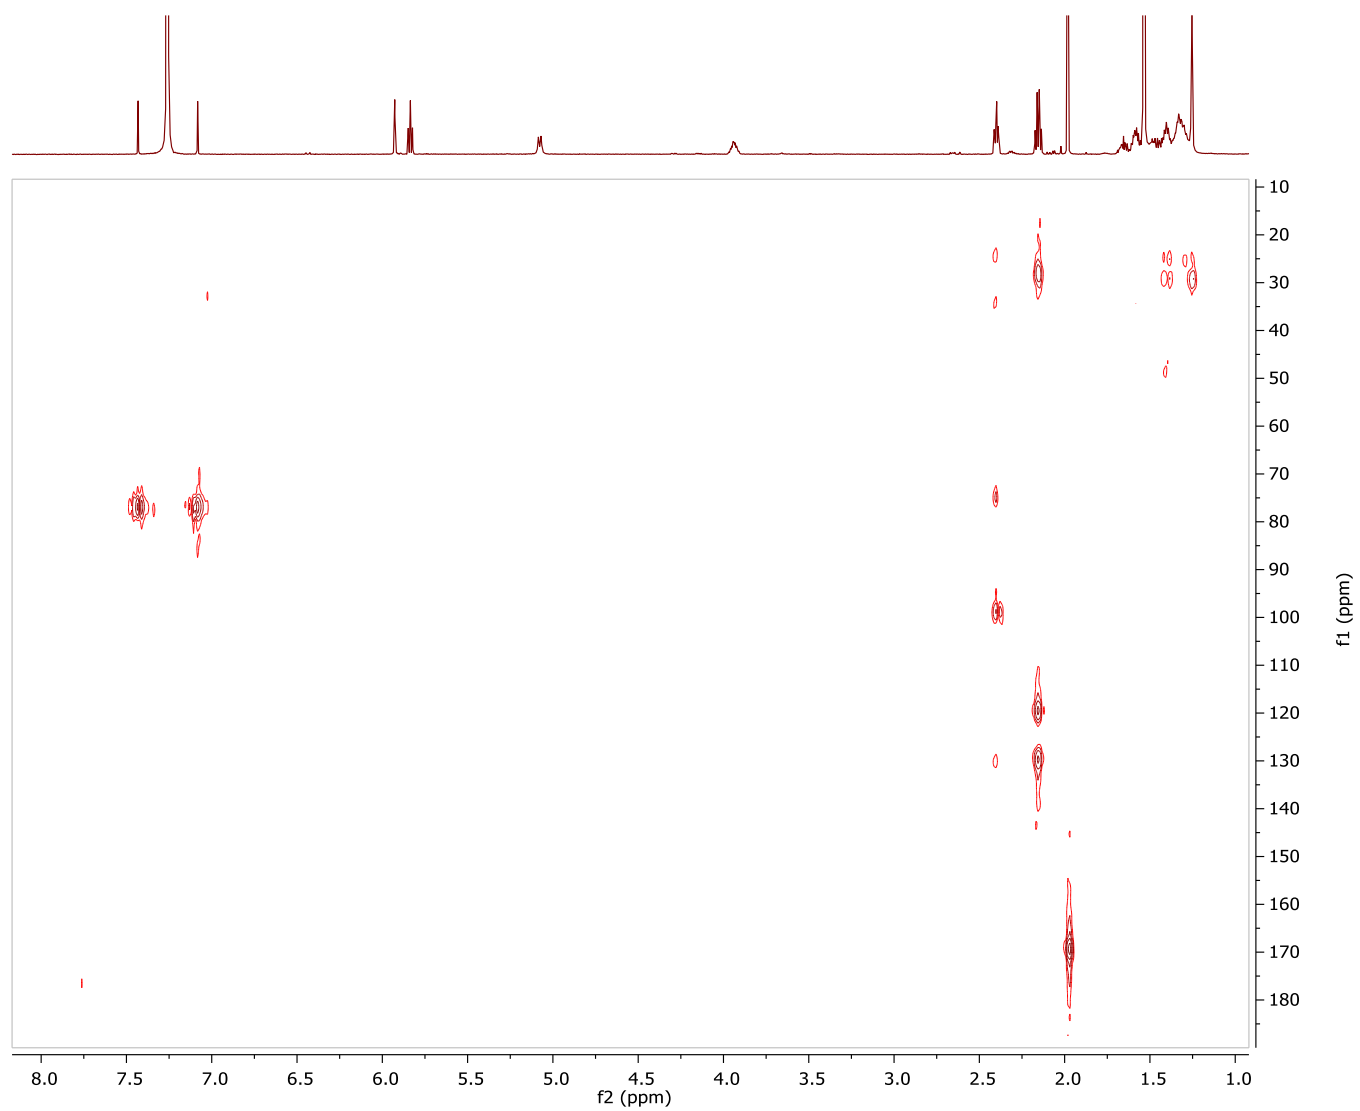

**Figure S14:** HMBC (600 MHz,  $\text{CDCl}_3$ ) of taveuniamide N (**3**).



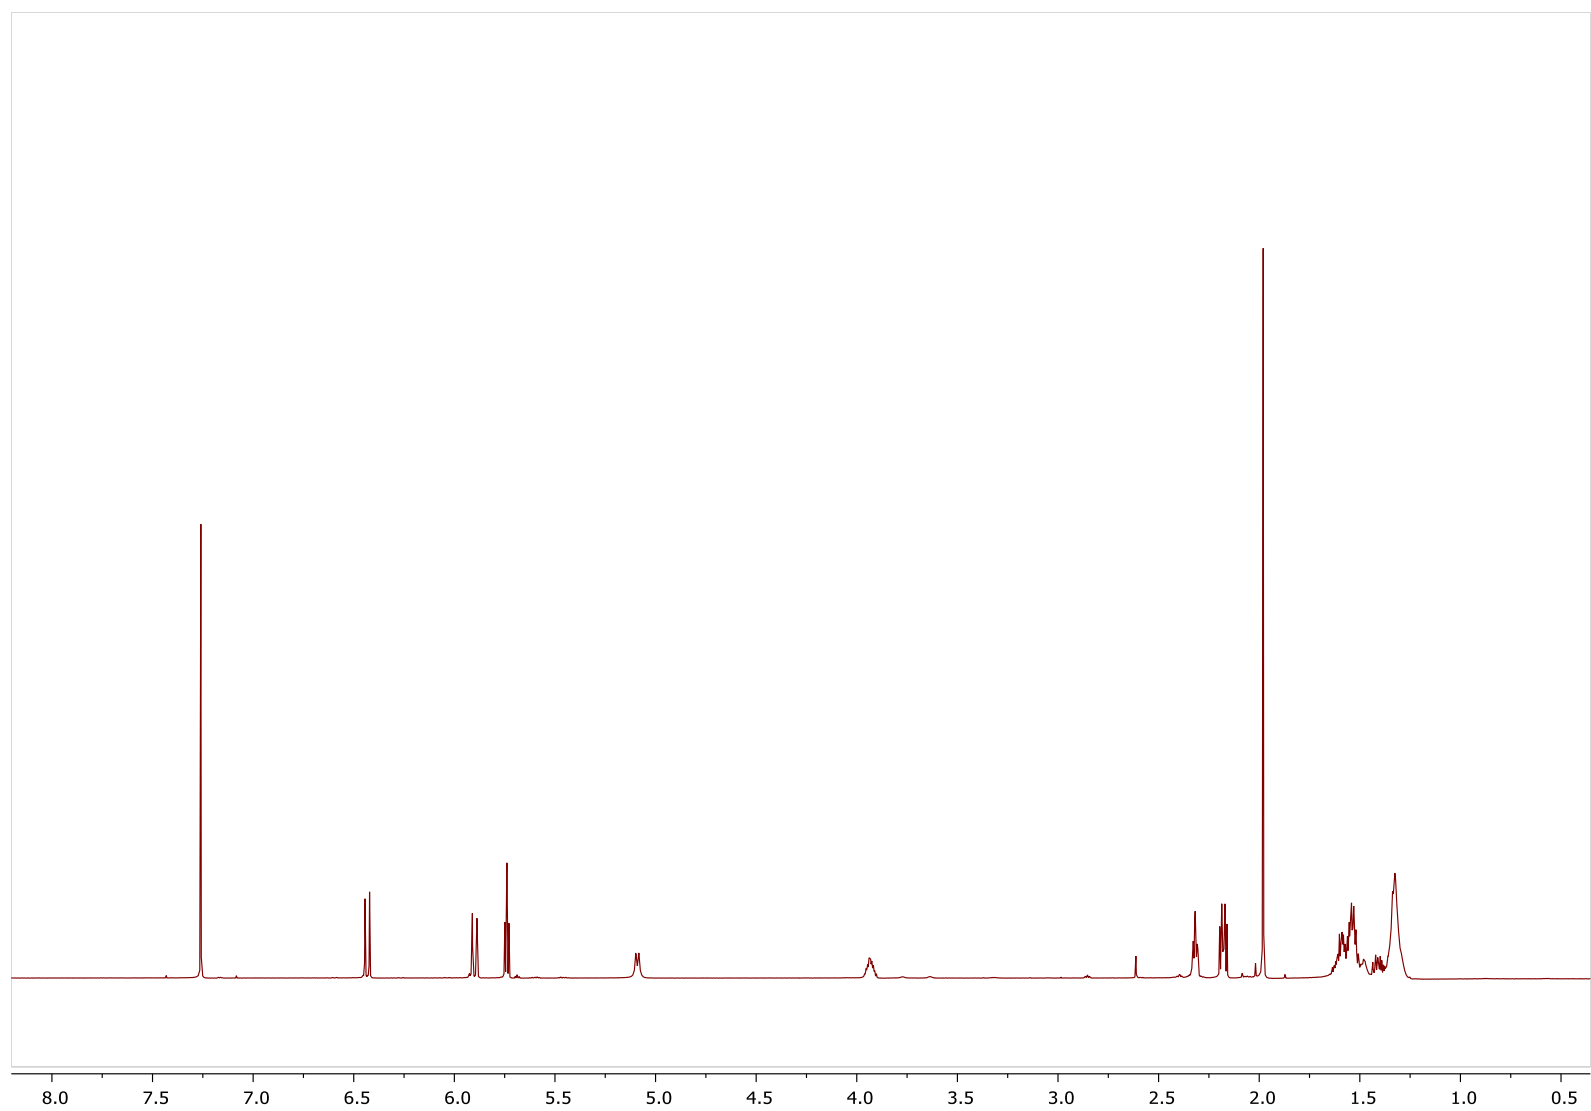

**Figure S15:**  $^1\text{H}$  NMR (600 MHz,  $\text{CDCl}_3$ ) of taveuniamide F (**4**).

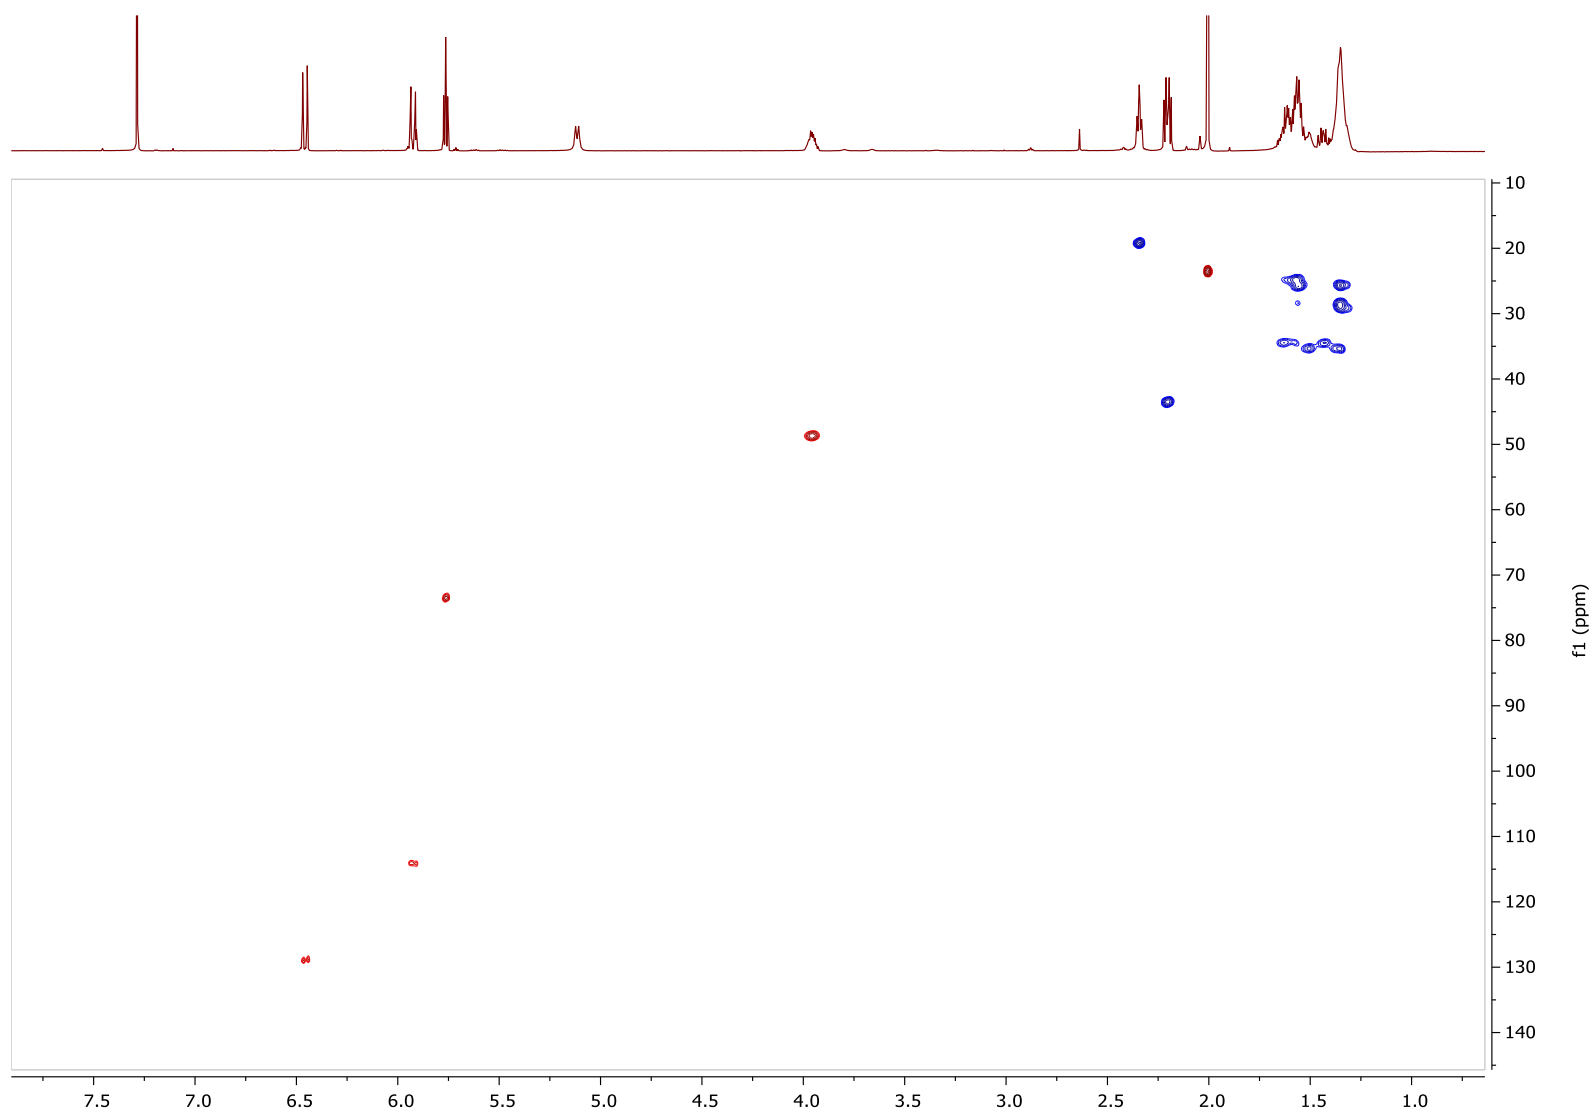

**Figure S16:** HSQC (600 MHz,  $\text{CDCl}_3$ ) of taveuniamide F (**4**).

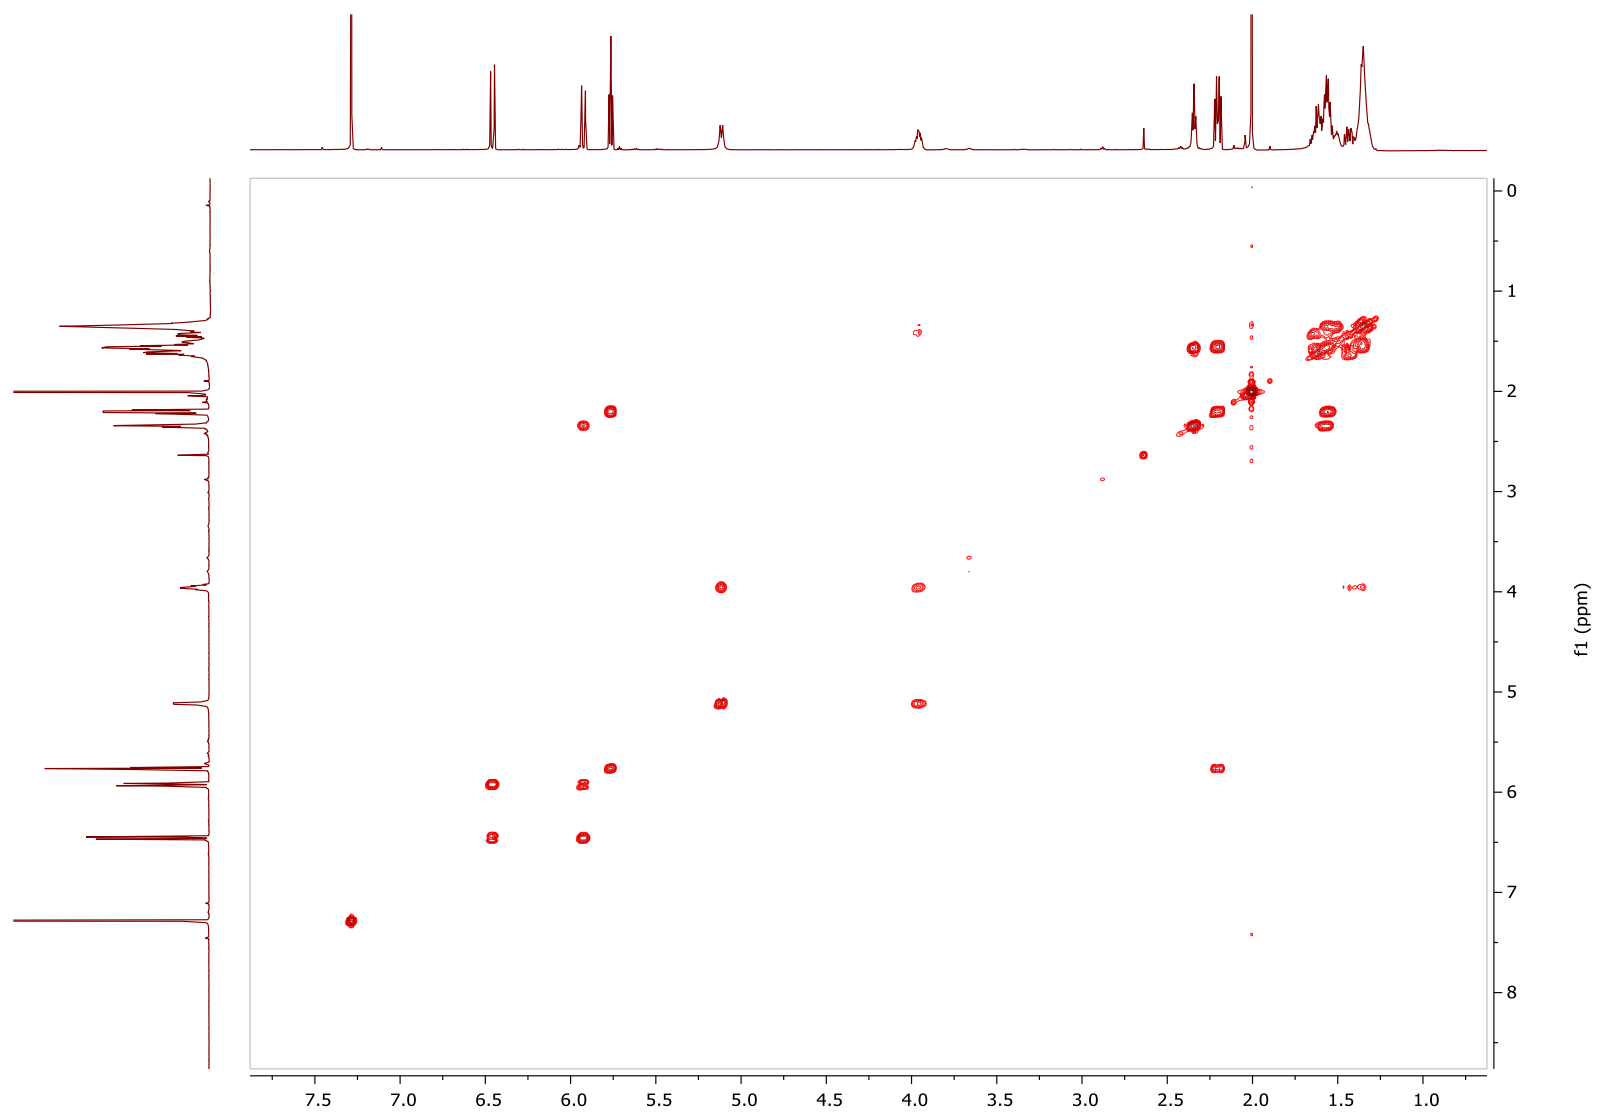

**Figure S17:** COSY (600 MHz, CDCl<sub>3</sub>) of taveuniamide F (**4**).

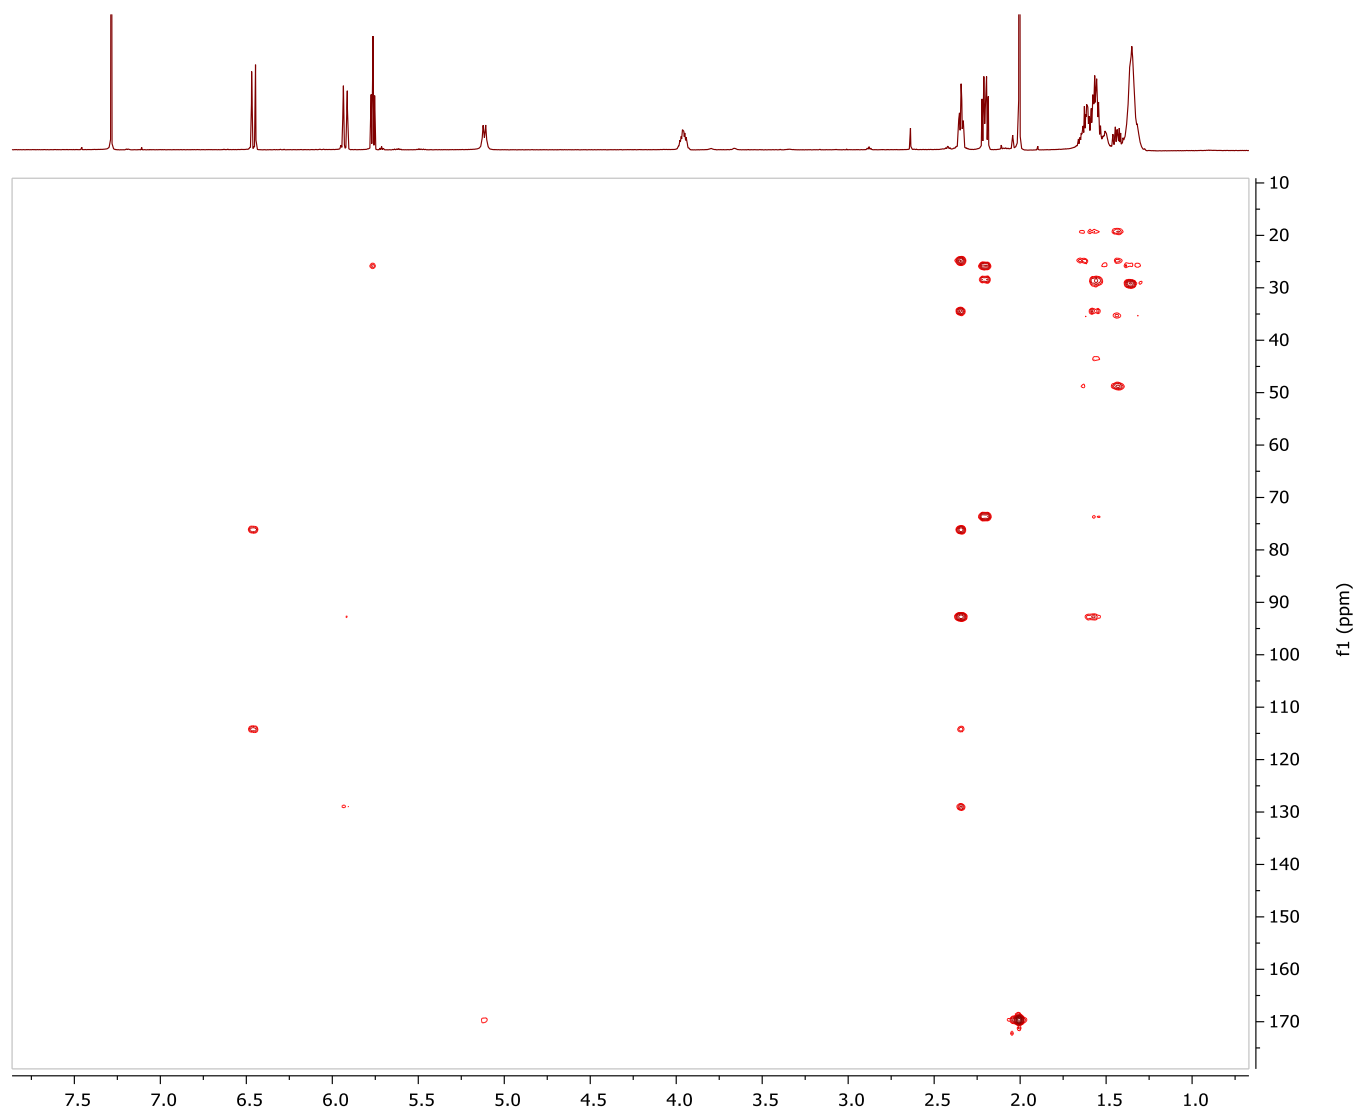

**Figure S18:** HMBC (600 MHz,  $\text{CDCl}_3$ ) of taveuniamide F (**4**).

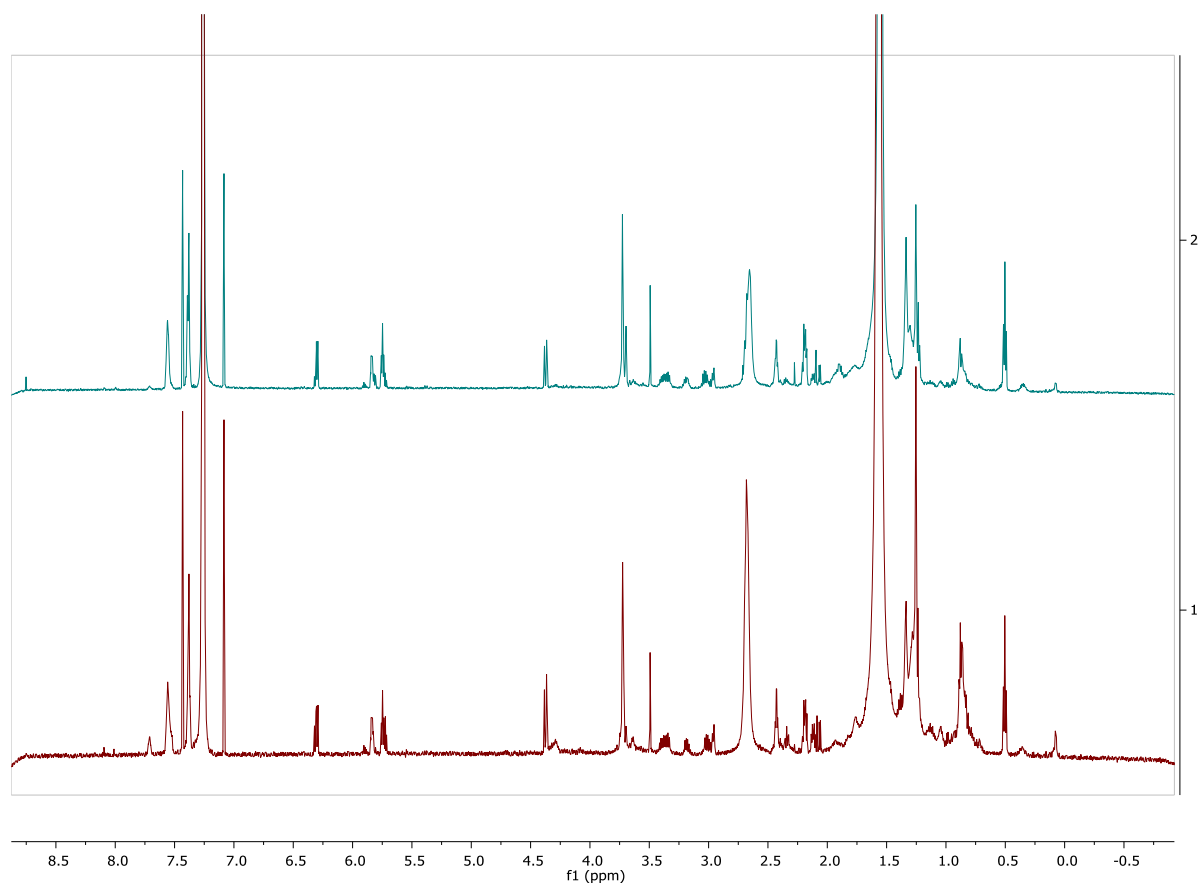

**Figure S19.**  $^1\text{H}$ NMR (600 MHz,  $\text{CDCl}_3$ ) of (S)-MTPA amide (top, **6a**) and (R)-MTPA amide (bottom, **6b**).

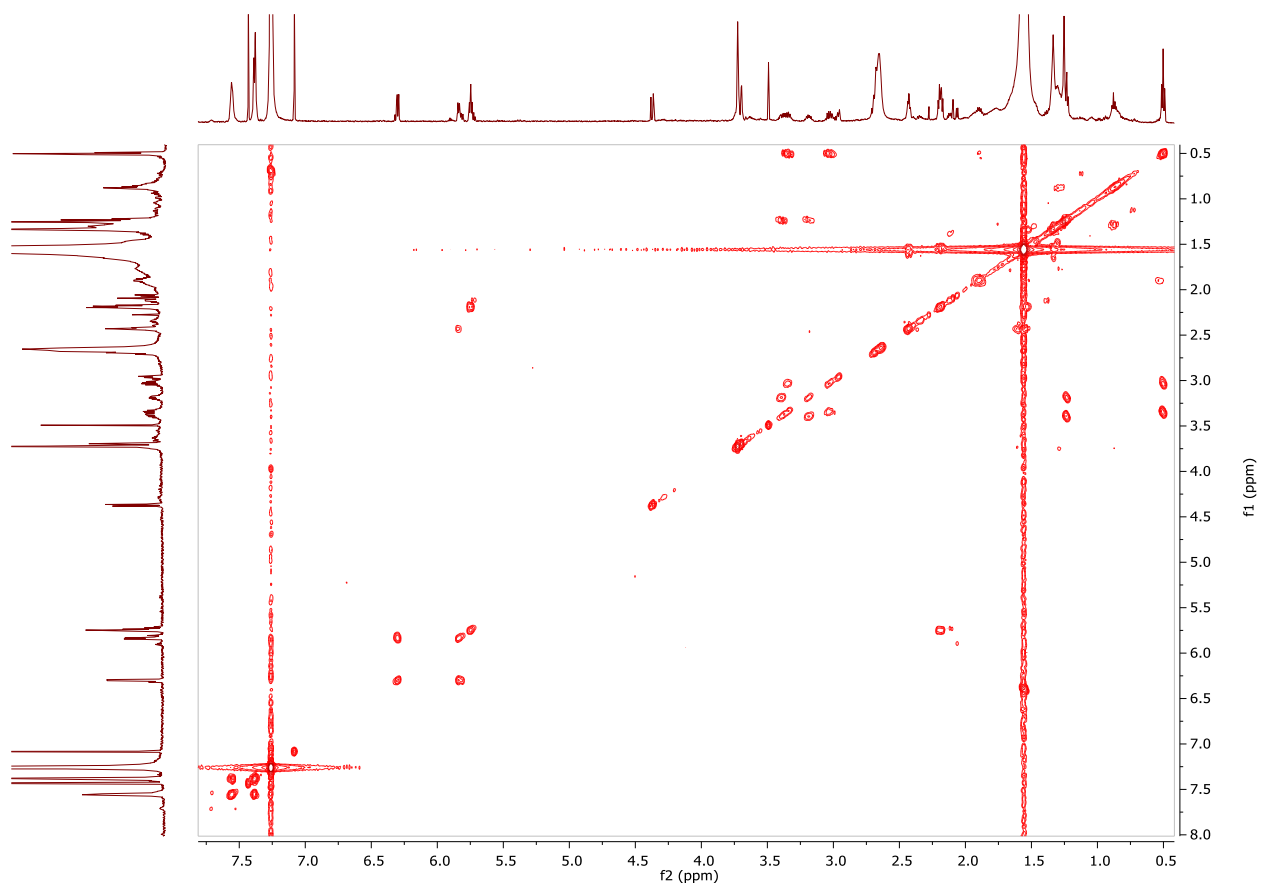

**Figure S20.** COSY (600 MHz, CDCl<sub>3</sub>) of the (*S*)-MTPA amide (**6a**).

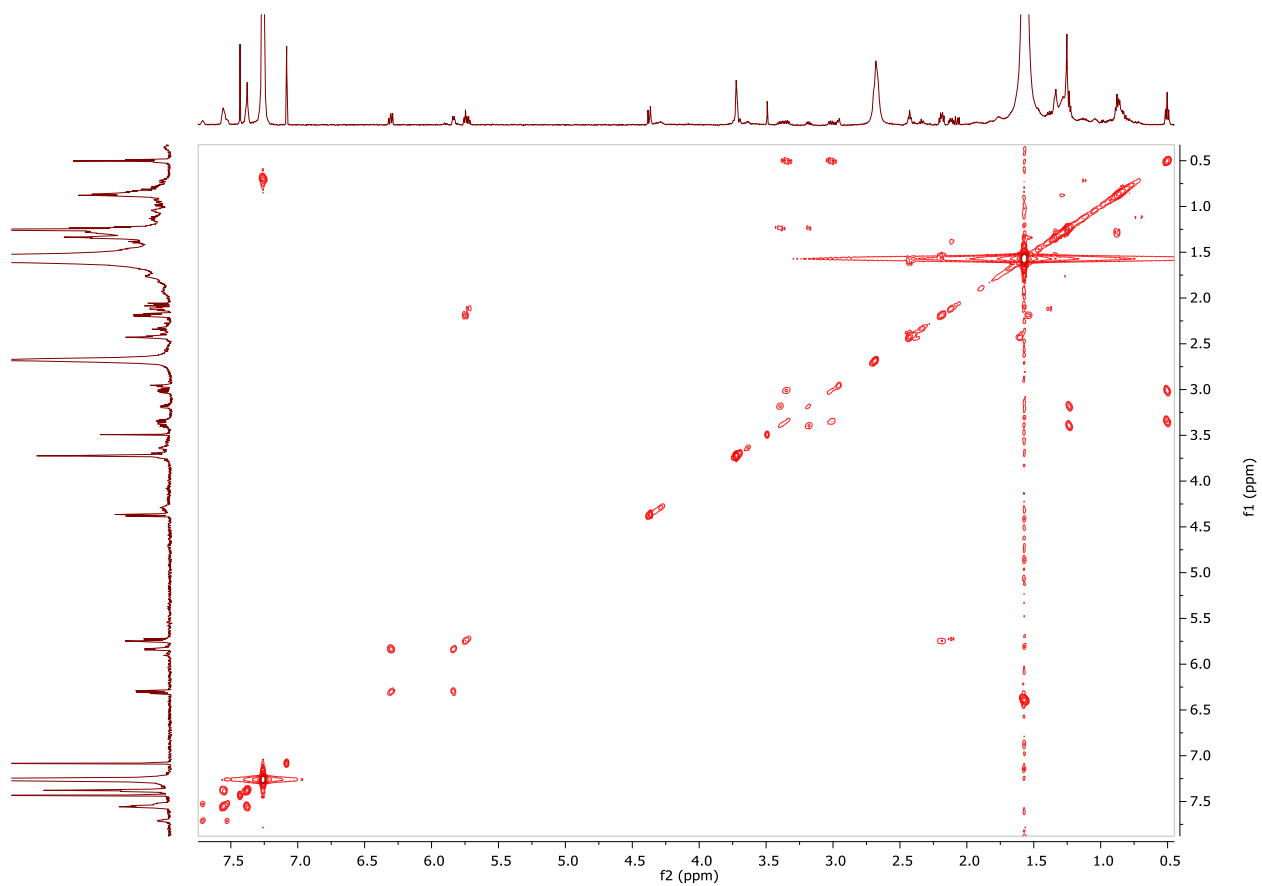

**Figure S21.** COSY (600 MHz,  $\text{CDCl}_3$ ) of the (*R*)-MTPA amide (**6b**).

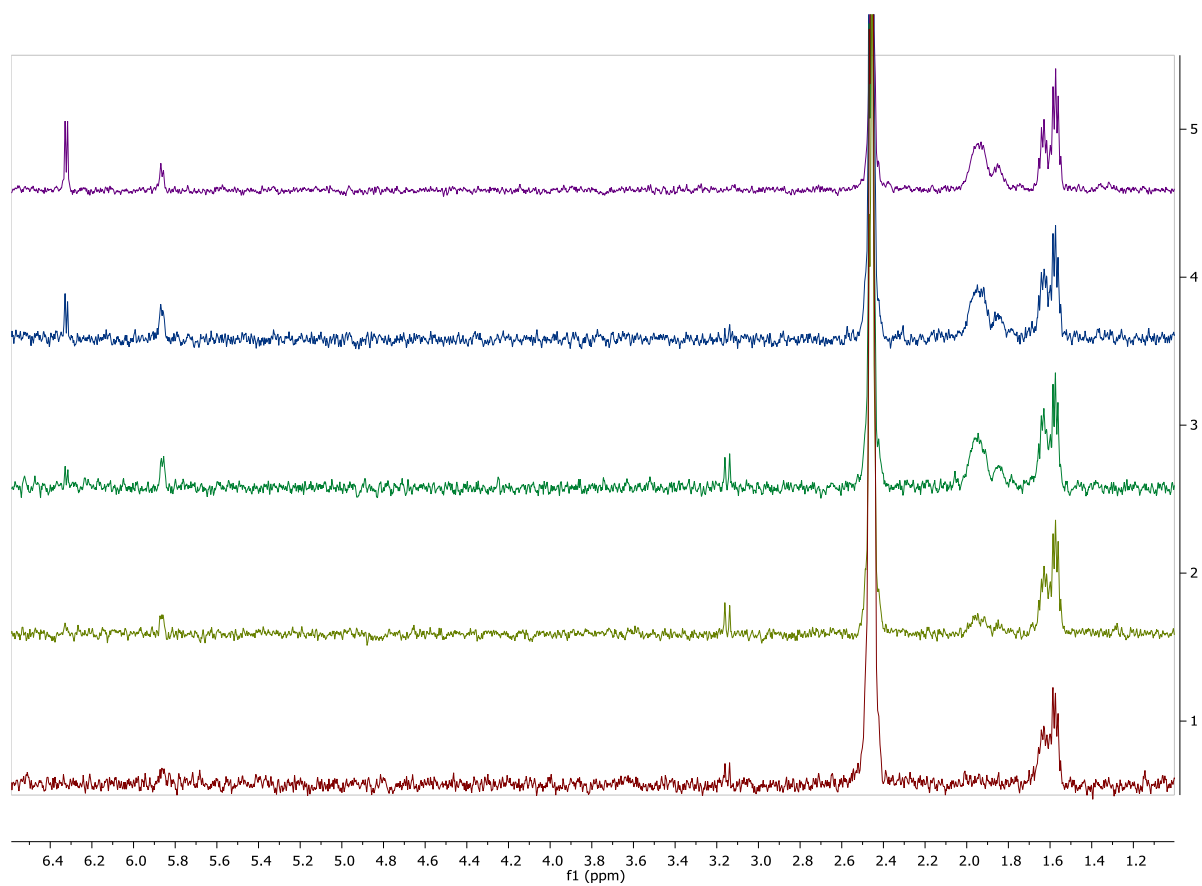

**Figure S22.** 1D TOCSY irradiating H-5 of the (*S*)-MTPA amide (**6a**) at 80 ms, 60 ms, 45 ms, 30 ms, and 15 ms (bottom to top)



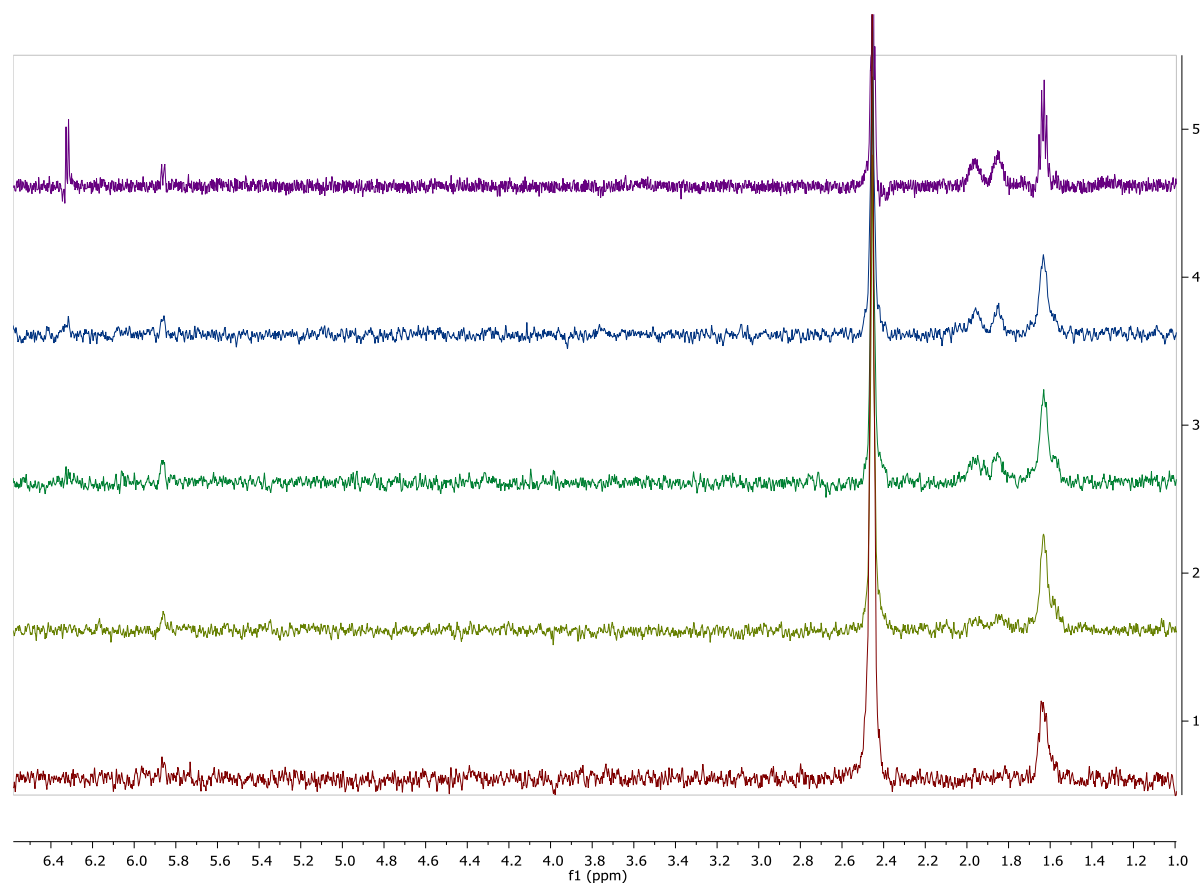

**Figure S23.** 1D TOCSY irradiating H-5 of the (*R*)-MTPA amide (**6b**) at 80 ms, 60 ms, 45 ms, 30 ms, and 15 ms (bottom to top).

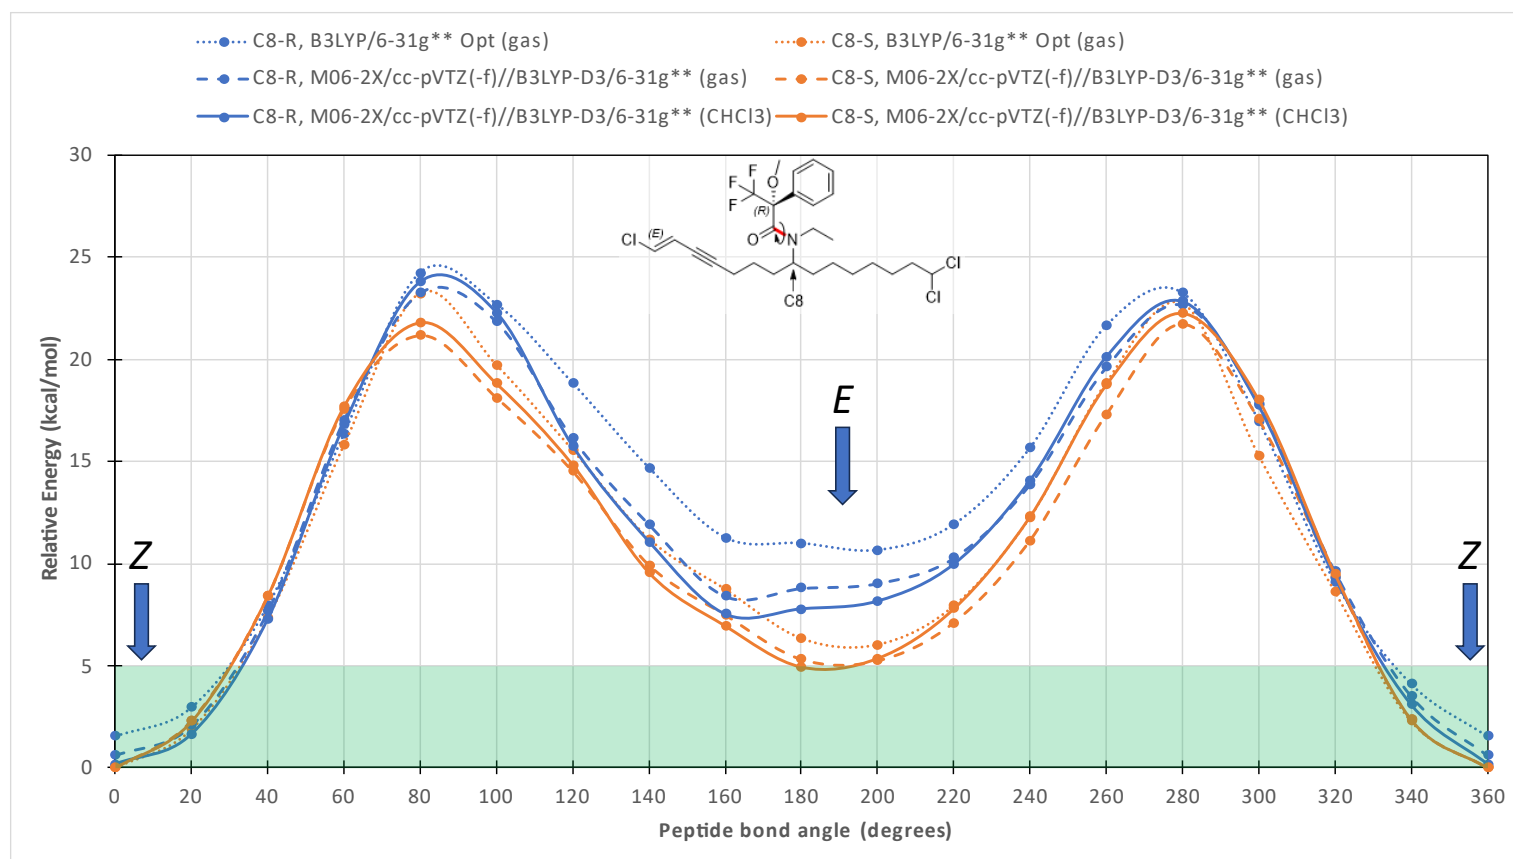

**Figure S24.** Results of DFT coordinate scan for the preferred configuration at the amide bond of the (*R*)-MTPA derivative of taveuniamide F. Both possibilities for the configuration of C8 were considered. The green shading indicates the thermally accessible energy range at room temperature (approximately 5 kcal/mol).

**Figure S25.** Results of Taveuniamide F (4) in GPCR MAX Panel Primary screen ( $\beta$ -arrestin) at 20  $\mu$ M in agonist and antagonist mode

| GPCR ID      | Control 1 | Mean RLU  | SD      | %CV   | Control 2 | Mean RLU  | SD      | %CV   | Assay Mode | Rep 1 RLU | Rep 2 RLU | Mean RLU  | SD      | % Activity |
|--------------|-----------|-----------|---------|-------|-----------|-----------|---------|-------|------------|-----------|-----------|-----------|---------|------------|
| ADCYAP1R1    | Baseline  | 48455.00  | 8172.4  | 0.169 | Max       | 476480.00 | 23407.9 | 0.049 | Agonist    | 53640     | 55040     | 54340.00  | 990     | 1.4        |
| ADORA3       | Baseline  | 13725.00  | 800.4   | 0.058 | Max       | 58280.00  | 4382.6  | 0.075 | Agonist    | 12600     | 13120     | 12860.00  | 367.7   | -1.9       |
| ADRA1B       | Baseline  | 58745.00  | 6223    | 0.106 | Max       | 476710.00 | 34646.7 | 0.073 | Agonist    | 48760     | 48520     | 48640.00  | 169.7   | -2.4       |
| ADRA2A       | Baseline  | 56390.00  | 5469.2  | 0.097 | Max       | 146810.00 | 4133.8  | 0.028 | Agonist    | 61120     | 58240     | 59680.00  | 2036.5  | 3.6        |
| ADRA2B       | Baseline  | 11975.00  | 1578.4  | 0.132 | Max       | 85490.00  | 6551.8  | 0.077 | Agonist    | 36960     | 33400     | 35180.00  | 2517.3  | 31.6       |
| ADRA2C       | Baseline  | 25345.00  | 3078.3  | 0.121 | Max       | 145830.00 | 12233.8 | 0.084 | Agonist    | 34640     | 33680     | 34160.00  | 678.8   | 7.3        |
| ADRB1        | Baseline  | 29773.33  | 6177.2  | 0.207 | Max       | 107980.00 | 9560.7  | 0.089 | Agonist    | 28680     | 27200     | 27940.00  | 1046.5  | -2.3       |
| ADRB2        | Baseline  | 14160.00  | 5769.4  | 0.407 | Max       | 85670.00  | 7898.8  | 0.092 | Agonist    | 20120     | 19040     | 19580.00  | 763.7   | 7.6        |
| AGTR1        | Baseline  | 131700.00 | 11668.6 | 0.089 | Max       | 527280.00 | 35677.6 | 0.068 | Agonist    | 141760    | 145320    | 143540.00 | 2517.3  | 3          |
| AGTRL1       | Baseline  | 65185.00  | 7297.2  | 0.112 | Max       | 323080.00 | 29207.1 | 0.09  | Agonist    | 55880     | 57480     | 56680.00  | 1131.4  | -3.3       |
| AVPR1A       | Baseline  | 6135.00   | 819.5   | 0.134 | Max       | 92580.00  | 5198.4  | 0.056 | Agonist    | 5360      | 4720      | 5040.00   | 452.6   | -1.3       |
| AVPR1B       | Baseline  | 3865.00   | 607.7   | 0.157 | Max       | 35340.00  | 2784.8  | 0.079 | Agonist    | 3600      | 4600      | 4100.00   | 707.1   | 0.7        |
| AVPR2        | Baseline  | 96240.00  | 11511.2 | 0.12  | Max       | 438250.00 | 41276.8 | 0.094 | Agonist    | 92000     | 93200     | 92600.00  | 848.5   | -1.1       |
| BDKRB1       | Baseline  | 3765.00   | 519.1   | 0.138 | Max       | 27660.00  | 2108.1  | 0.076 | Agonist    | 2920      | 3440      | 3180.00   | 367.7   | -2.4       |
| BDKRB2       | Baseline  | 157840.00 | 17681.3 | 0.112 | Max       | 741100.00 | 57942.2 | 0.078 | Agonist    | 143000    | 144240    | 143620.00 | 876.8   | -2.4       |
| BRS3         | Baseline  | 68210.00  | 10803.1 | 0.158 | Max       | 286270.00 | 22749.2 | 0.079 | Agonist    | 60960     | 62000     | 61480.00  | 735.4   | -3.1       |
| C3AR1        | Baseline  | 7025.00   | 1182.1  | 0.168 | Max       | 260740.00 | 36854.4 | 0.141 | Agonist    | 6520      | 7280      | 6900.00   | 537.4   | 0          |
| C5aR1        | Baseline  | 22190.00  | 1610.4  | 0.073 | Max       | 272890.00 | 15421.4 | 0.057 | Agonist    | 16560     | 16800     | 16680.00  | 169.7   | -2.2       |
| C5L2         | Baseline  | 56200.00  | 3618.9  | 0.064 | Max       | 166520.00 | 15394.4 | 0.092 | Agonist    | 55040     | 64040     | 59540.00  | 6364    | 3          |
| CALCR        | Baseline  | 6145.00   | 397.1   | 0.065 | Max       | 28170.00  | 2917.6  | 0.104 | Agonist    | 4960      | 5000      | 4980.00   | 28.3    | -5.3       |
| CALCRL-RAMP1 | Baseline  | 10360.00  | 1635.5  | 0.158 | Max       | 128370.00 | 9444.8  | 0.074 | Agonist    | 8840      | 10480     | 9660.00   | 1159.7  | -0.6       |
| CALCRL-RAMP2 | Baseline  | 240725.00 | 17081.4 | 0.071 | Max       | 810580.00 | 33357.2 | 0.041 | Agonist    | 207960    | 222440    | 215200.00 | 10238.9 | -4.5       |
| CALCRL-RAMP3 | Baseline  | 25505.00  | 3852.8  | 0.151 | Max       | 298400.00 | 31137.1 | 0.104 | Agonist    | 21120     | 25080     | 23100.00  | 2800.1  | -0.9       |
| CALCR-RAMP2  | Baseline  | 9425.00   | 1506.6  | 0.16  | Max       | 53090.00  | 2352    | 0.044 | Agonist    | 9120      | 9320      | 9220.00   | 141.4   | -0.5       |
| CALCR-RAMP3  | Baseline  | 2200.00   | 219.1   | 0.1   | Max       | 6480.00   | 250.9   | 0.039 | Agonist    | 1920      | 1880      | 1900.00   | 28.3    | -7         |

|        |          |           |         |       |     |            |         |       |         |        |        |           |        |       |
|--------|----------|-----------|---------|-------|-----|------------|---------|-------|---------|--------|--------|-----------|--------|-------|
| CCKAR  | Baseline | 6970.00   | 903.3   | 0.13  | Max | 96290.00   | 4141.7  | 0.043 | Agonist | 5880   | 7200   | 6540.00   | 933.4  | -0.5  |
| CCKBR  | Baseline | 133635.00 | 14906.3 | 0.112 | Max | 437560.00  | 9533.7  | 0.022 | Agonist | 146360 | 151000 | 148680.00 | 3281   | 5     |
| CCR1   | Baseline | 202600.00 | 10293.4 | 0.051 | Max | 362733.33  | 12049   | 0.033 | Agonist | 170560 | 178640 | 174600.00 | 5713.4 | -17.5 |
| CCR10  | Baseline | 4585.00   | 555.9   | 0.121 | Max | 54220.00   | 5307.6  | 0.098 | Agonist | 3160   | 3880   | 3520.00   | 509.1  | -2.1  |
| CCR2   | Baseline | 8990.00   | 1478.5  | 0.164 | Max | 164080.00  | 10292.9 | 0.063 | Agonist | 6360   | 7440   | 6900.00   | 763.7  | -1.3  |
| CCR3   | Baseline | 24045.00  | 2346.4  | 0.098 | Max | 67840.00   | 4755.9  | 0.07  | Agonist | 20960  | 20320  | 20640.00  | 452.6  | -7.8  |
| CCR4   | Baseline | 31690.00  | 6179.2  | 0.195 | Max | 344000.00  | 37277.4 | 0.108 | Agonist | 29560  | 28920  | 29240.00  | 452.6  | -0.8  |
| CCR5   | Baseline | 7405.00   | 1291.3  | 0.174 | Max | 163030.00  | 8707.4  | 0.053 | Agonist | 6000   | 6000   | 6000.00   | 0      | -0.9  |
| CCR6   | Baseline | 9625.00   | 1376.5  | 0.143 | Max | 134000.00  | 5976    | 0.045 | Agonist | 11320  | 12240  | 11780.00  | 650.5  | 1.7   |
| CCR7   | Baseline | 194430.00 | 12963.9 | 0.067 | Max | 811160.00  | 52830.4 | 0.065 | Agonist | 178800 | 172200 | 175500.00 | 4666.9 | -3.1  |
| CCR8   | Baseline | 3875.00   | 407     | 0.105 | Max | 132560.00  | 10424   | 0.079 | Agonist | 2120   | 2360   | 2240.00   | 169.7  | -1.3  |
| CCR9   | Baseline | 9390.00   | 1456.7  | 0.155 | Max | 256980.00  | 37816.1 | 0.147 | Agonist | 4040   | 4520   | 4280.00   | 339.4  | -2.1  |
| CHRM1  | Baseline | 30595.00  | 3665.1  | 0.12  | Max | 95640.00   | 6499.2  | 0.068 | Agonist | 22000  | 22560  | 22280.00  | 396    | -12.8 |
| CHRM2  | Baseline | 20840.00  | 3378.2  | 0.162 | Max | 147780.00  | 13905.2 | 0.094 | Agonist | 21440  | 20240  | 20840.00  | 848.5  | 0     |
| CHRM3  | Baseline | 11890.00  | 1913.8  | 0.161 | Max | 51506.67   | 2491.7  | 0.048 | Agonist | 11200  | 11560  | 11380.00  | 254.6  | -1.3  |
| CHRM4  | Baseline | 35520.00  | 2549.3  | 0.072 | Max | 95910.00   | 6155.2  | 0.064 | Agonist | 26520  | 26000  | 26260.00  | 367.7  | -15.3 |
| CHRM5  | Baseline | 298306.67 | 29897.9 | 0.1   | Max | 748550.00  | 45923.8 | 0.061 | Agonist | 244400 | 244960 | 244680.00 | 396    | -11.9 |
| CMKLR1 | Baseline | 20775.00  | 2241.7  | 0.108 | Max | 308390.00  | 18748.1 | 0.061 | Agonist | 21480  | 20240  | 20860.00  | 876.8  | 0     |
| CNR1   | Baseline | 10730.00  | 2086.7  | 0.194 | Max | 108010.00  | 8658.7  | 0.08  | Agonist | 11000  | 10640  | 10820.00  | 254.6  | 0.1   |
| CNR2   | Baseline | 68815.00  | 7746.6  | 0.113 | Max | 158906.67  | 5397.7  | 0.034 | Agonist | 50920  | 54200  | 52560.00  | 2319.3 | -18   |
| CRHR1  | Baseline | 51755.00  | 7468    | 0.144 | Max | 643040.00  | 59389.6 | 0.092 | Agonist | 43240  | 43920  | 43580.00  | 480.8  | -1.4  |
| CRHR2  | Baseline | 13645.00  | 1893    | 0.139 | Max | 381810.00  | 38733.3 | 0.101 | Agonist | 11360  | 13240  | 12300.00  | 1329.4 | -0.4  |
| CRT2   | Baseline | 20290.00  | 1506.7  | 0.074 | Max | 115370.00  | 8278.4  | 0.072 | Agonist | 18720  | 21200  | 19960.00  | 1753.6 | -0.3  |
| CX3CR1 | Baseline | 78110.00  | 7825    | 0.1   | Max | 1259580.00 | 56995.3 | 0.045 | Agonist | 55720  | 56520  | 56120.00  | 565.7  | -1.9  |
| CXCR1  | Baseline | 8015.00   | 1298.8  | 0.162 | Max | 181400.00  | 12026.7 | 0.066 | Agonist | 6400   | 8120   | 7260.00   | 1216.2 | -0.4  |
| CXCR2  | Baseline | 30225.00  | 2298.3  | 0.076 | Max | 206060.00  | 11417.4 | 0.055 | Agonist | 28040  | 24640  | 26340.00  | 2404.2 | -2.2  |
| CXCR3  | Baseline | 41720.00  | 4595.8  | 0.11  | Max | 126946.67  | 8894.4  | 0.07  | Agonist | 39240  | 39120  | 39180.00  | 84.8   | -3    |
| CXCR4  | Baseline | 4775.00   | 532.4   | 0.111 | Max | 19653.33   | 1575    | 0.08  | Agonist | 4720   | 4440   | 4580.00   | 198    | -1.3  |
| CXCR5  | Baseline | 16165.00  | 1385.6  | 0.086 | Max | 72410.00   | 6365.4  | 0.088 | Agonist | 13920  | 16440  | 15180.00  | 1781.9 | -1.8  |
| CXCR6  | Baseline | 800.00    | 145     | 0.181 | Max | 5720.00    | 360.7   | 0.063 | Agonist | 1040   | 1040   | 1040.00   | 0      | 4.9   |

|       |          |           |         |       |     |            |         |       |         |        |        |           |        |      |
|-------|----------|-----------|---------|-------|-----|------------|---------|-------|---------|--------|--------|-----------|--------|------|
| CXCR7 | Baseline | 21475.00  | 1376.1  | 0.064 | Max | 148030.00  | 3033.4  | 0.02  | Agonist | 20960  | 20960  | 20960.00  | 0      | -0.4 |
| DRD1  | Baseline | 5505.00   | 758.6   | 0.138 | Max | 91970.00   | 12562.1 | 0.137 | Agonist | 5760   | 5240   | 5500.00   | 367.7  | 0    |
| DRD2L | Baseline | 8090.00   | 789.9   | 0.098 | Max | 42500.00   | 3713.3  | 0.087 | Agonist | 7840   | 8560   | 8200.00   | 509.1  | 0.3  |
| DRD2S | Baseline | 31560.00  | 4041    | 0.128 | Max | 166980.00  | 8897.1  | 0.053 | Agonist | 31200  | 32880  | 32040.00  | 1187.9 | 0.4  |
| DRD3  | Baseline | 37573.33  | 5119.6  | 0.136 | Max | 119610.00  | 4432    | 0.037 | Agonist | 38320  | 36960  | 37640.00  | 961.7  | 0.1  |
| DRD4  | Baseline | 1435.00   | 162     | 0.113 | Max | 8830.00    | 277.8   | 0.031 | Agonist | 1640   | 1280   | 1460.00   | 254.6  | 0.3  |
| DRD5  | Baseline | 4765.00   | 832.3   | 0.175 | Max | 64370.00   | 2501.1  | 0.039 | Agonist | 8240   | 8280   | 8260.00   | 28.3   | 5.9  |
| EBI2  | Baseline | 73285.00  | 6612.4  | 0.09  | Max | 934050.00  | 38150.7 | 0.041 | Agonist | 51600  | 50280  | 50940.00  | 933.4  | -2.6 |
| EDG1  | Baseline | 6235.00   | 954.4   | 0.153 | Max | 90510.00   | 11112.7 | 0.123 | Agonist | 8120   | 9560   | 8840.00   | 1018.2 | 3.1  |
| EDG3  | Baseline | 213755.00 | 37042.8 | 0.173 | Max | 1180390.00 | 54040.5 | 0.046 | Agonist | 166840 | 164440 | 165640.00 | 1697.1 | -5   |
| EDG4  | Baseline | 148775.00 | 10759.3 | 0.072 | Max | 378960.00  | 32300.6 | 0.085 | Agonist | 137240 | 145200 | 141220.00 | 5628.6 | -3.3 |
| EDG5  | Baseline | 55855.00  | 8967.6  | 0.161 | Max | 650120.00  | 16484.1 | 0.025 | Agonist | 38600  | 38960  | 38780.00  | 254.6  | -2.9 |
| EDG6  | Baseline | 49355.00  | 3594.8  | 0.073 | Max | 106120.00  | 3518    | 0.033 | Agonist | 54720  | 57800  | 56260.00  | 2177.9 | 12.2 |
| EDG7  | Baseline | 78730.00  | 12251.4 | 0.156 | Max | 400750.00  | 10072.4 | 0.025 | Agonist | 117520 | 119160 | 118340.00 | 1159.7 | 12.3 |
| EDNRA | Baseline | 2820.00   | 307.6   | 0.109 | Max | 47850.00   | 1843.9  | 0.039 | Agonist | 2600   | 2680   | 2640.00   | 56.6   | -0.4 |
| EDNRB | Baseline | 7520.00   | 719     | 0.096 | Max | 112280.00  | 8494.1  | 0.076 | Agonist | 6000   | 6120   | 6060.00   | 84.8   | -1.4 |
| F2R   | Baseline | 4210.00   | 1205.1  | 0.286 | Max | 48720.00   | 6982    | 0.143 | Agonist | 6080   | 6920   | 6500.00   | 594    | 5.1  |
| F2RL1 | Baseline | 137280.00 | 8748    | 0.064 | Max | 604070.00  | 46341   | 0.077 | Agonist | 144680 | 146640 | 145660.00 | 1385.9 | 1.8  |
| F2RL3 | Baseline | 234745.00 | 9614.2  | 0.041 | Max | 605700.00  | 25682.7 | 0.042 | Agonist | 251240 | 239760 | 245500.00 | 8117.6 | 2.9  |
| FFAR1 | Baseline | 29440.00  | 1713.4  | 0.058 | Max | 82530.00   | 6397    | 0.078 | Agonist | 29000  | 29560  | 29280.00  | 396    | -0.3 |
| FPR1  | Baseline | 126415.00 | 12685.5 | 0.1   | Max | 445390.00  | 31902.7 | 0.072 | Agonist | 132440 | 129880 | 131160.00 | 1810.2 | 1.5  |
| FPRL1 | Baseline | 9800.00   | 711.1   | 0.073 | Max | 274620.00  | 17632.2 | 0.064 | Agonist | 10320  | 9000   | 9660.00   | 933.4  | -0.1 |
| FSHR  | Baseline | 7725.00   | 544.4   | 0.07  | Max | 42130.00   | 4273.1  | 0.101 | Agonist | 7160   | 7360   | 7260.00   | 141.4  | -1.4 |
| GALR1 | Baseline | 117125.00 | 16278   | 0.139 | Max | 731290.00  | 32376.5 | 0.044 | Agonist | 86680  | 86440  | 86560.00  | 169.7  | -5   |
| GALR2 | Baseline | 76130.00  | 6887.4  | 0.09  | Max | 168420.00  | 4693.3  | 0.028 | Agonist | 73480  | 79000  | 76240.00  | 3903.2 | 0.1  |
| GCGR  | Baseline | 32320.00  | 2272.6  | 0.07  | Max | 307560.00  | 8233.1  | 0.027 | Agonist | 44840  | 39560  | 42200.00  | 3733.5 | 3.6  |
| GHSR  | Baseline | 49220.00  | 5747.4  | 0.117 | Max | 183490.00  | 13491.6 | 0.074 | Agonist | 45480  | 48560  | 47020.00  | 2177.9 | -1.6 |
| GIPR  | Baseline | 680.00    | 88.2    | 0.13  | Max | 4510.00    | 535     | 0.119 | Agonist | 400    | 560    | 480.00    | 113.1  | -5.2 |
| GLP1R | Baseline | 5190.00   | 992.3   | 0.191 | Max | 212790.00  | 20291.5 | 0.095 | Agonist | 4240   | 4040   | 4140.00   | 141.4  | -0.5 |
| GLP2R | Baseline | 8440.00   | 1364.9  | 0.162 | Max | 65270.00   | 2579.6  | 0.04  | Agonist | 8560   | 9760   | 9160.00   | 848.5  | 1.3  |

|         |          |           |         |       |     |           |         |       |         |        |        |           |         |       |
|---------|----------|-----------|---------|-------|-----|-----------|---------|-------|---------|--------|--------|-----------|---------|-------|
| GPR1    | Baseline | 8595.00   | 675.3   | 0.079 | Max | 143240.00 | 3199.3  | 0.022 | Agonist | 6960   | 7320   | 7140.00   | 254.6   | -1.1  |
| GPR103  | Baseline | 7120.00   | 537.5   | 0.075 | Max | 19480.00  | 1519    | 0.078 | Agonist | 5400   | 5160   | 5280.00   | 169.7   | -14.9 |
| GPR109A | Baseline | 48250.00  | 4465.6  | 0.093 | Max | 202900.00 | 13075.6 | 0.064 | Agonist | 45480  | 48200  | 46840.00  | 1923.3  | -0.9  |
| GPR109B | Baseline | 59180.00  | 6502.9  | 0.11  | Max | 485300.00 | 23787.1 | 0.049 | Agonist | 42320  | 46720  | 44520.00  | 3111.3  | -3.4  |
| GPR119  | Baseline | 41740.00  | 3222.5  | 0.077 | Max | 84450.00  | 1687.1  | 0.02  | Agonist | 36480  | 37920  | 37200.00  | 1018.2  | -10.6 |
| GPR120  | Baseline | 5360.00   | 607.8   | 0.113 | Max | 20550.00  | 1502.8  | 0.073 | Agonist | 3280   | 2920   | 3100.00   | 254.6   | -14.9 |
| GPR35   | Baseline | 12600.00  | 2040.8  | 0.162 | Max | 98350.00  | 6179.1  | 0.063 | Agonist | 10760  | 10680  | 10720.00  | 56.6    | -2.2  |
| GPR92   | Baseline | 91360.00  | 11602.1 | 0.127 | Max | 250240.00 | 10830.2 | 0.043 | Agonist | 89200  | 90000  | 89600.00  | 565.7   | -1.1  |
| GRPR    | Baseline | 5005.00   | 572.3   | 0.114 | Max | 115450.00 | 7294.2  | 0.063 | Agonist | 3960   | 4640   | 4300.00   | 480.8   | -0.6  |
| HCRT1   | Baseline | 12040.00  | 1724.2  | 0.143 | Max | 349540.00 | 36498.8 | 0.104 | Agonist | 13040  | 12880  | 12960.00  | 113.1   | 0.3   |
| HCRT2   | Baseline | 5555.00   | 1060.1  | 0.191 | Max | 497870.00 | 32276.8 | 0.065 | Agonist | 6200   | 5800   | 6000.00   | 282.8   | 0.1   |
| HRH1    | Baseline | 49585.00  | 4519.1  | 0.091 | Max | 181180.00 | 12977.8 | 0.072 | Agonist | 46320  | 49320  | 47820.00  | 2121.3  | -1.3  |
| HRH2    | Baseline | 11720.00  | 1363.4  | 0.116 | Max | 38293.33  | 2758.9  | 0.072 | Agonist | 10240  | 10680  | 10460.00  | 311.1   | -4.7  |
| HRH3    | Baseline | 4490.00   | 534.8   | 0.119 | Max | 29220.00  | 1686.2  | 0.058 | Agonist | 3640   | 4520   | 4080.00   | 622.2   | -1.7  |
| HRH4    | Baseline | 33580.00  | 2426.5  | 0.072 | Max | 147290.00 | 3252.3  | 0.022 | Agonist | 31880  | 29400  | 30640.00  | 1753.6  | -2.6  |
| HTR1A   | Baseline | 177580.00 | 24198   | 0.136 | Max | 689960.00 | 49142.8 | 0.071 | Agonist | 155640 | 178760 | 167200.00 | 16348.3 | -2    |
| HTR1B   | Baseline | 48313.33  | 1464.3  | 0.03  | Max | 131333.33 | 12112.8 | 0.092 | Agonist | 47320  | 48880  | 48100.00  | 1103.1  | -0.3  |
| HTR1E   | Baseline | 5828.57   | 422.5   | 0.072 | Max | 14840.00  | 1109.2  | 0.075 | Agonist | 4840   | 5040   | 4940.00   | 141.4   | -9.9  |
| HTR1F   | Baseline | 13348.57  | 864.3   | 0.065 | Max | 40226.67  | 3456.3  | 0.086 | Agonist | 12200  | 11680  | 11940.00  | 367.7   | -5.2  |
| HTR2A   | Baseline | 40855.00  | 6454.4  | 0.158 | Max | 285440.00 | 17703.1 | 0.062 | Agonist | 29960  | 28000  | 28980.00  | 1385.9  | -4.9  |
| HTR2C   | Baseline | 74966.67  | 6137.6  | 0.082 | Max | 181160.00 | 11558.8 | 0.064 | Agonist | 70840  | 70920  | 70880.00  | 56.6    | -3.8  |
| HTR5A   | Baseline | 66653.33  | 9131    | 0.137 | Max | 276500.00 | 24512   | 0.089 | Agonist | 58000  | 56200  | 57100.00  | 1272.8  | -4.6  |
| KISS1R  | Baseline | 5640.00   | 811.1   | 0.144 | Max | 32500.00  | 995.2   | 0.031 | Agonist | 3880   | 3840   | 3860.00   | 28.3    | -6.6  |
| LHCGR   | Baseline | 1650.00   | 264.2   | 0.16  | Max | 10920.00  | 56.6    | 0.005 | Agonist | 1200   | 1480   | 1340.00   | 198     | -3.3  |
| LTB4R   | Baseline | 17770.00  | 2040    | 0.115 | Max | 174940.00 | 6873.1  | 0.039 | Agonist | 16840  | 15920  | 16380.00  | 650.5   | -0.9  |
| MC1R    | Baseline | 1355.00   | 154.8   | 0.114 | Max | 5386.67   | 622.7   | 0.116 | Agonist | 920    | 1120   | 1020.00   | 141.4   | -8.3  |
| MC3R    | Baseline | 1765.00   | 163.4   | 0.093 | Max | 8870.00   | 706.1   | 0.08  | Agonist | 1120   | 1040   | 1080.00   | 56.6    | -9.6  |
| MC4R    | Baseline | 5370.00   | 921.6   | 0.172 | Max | 38050.00  | 2697.2  | 0.071 | Agonist | 4320   | 4040   | 4180.00   | 198     | -3.6  |
| MC5R    | Baseline | 9335.00   | 608.1   | 0.065 | Max | 23960.00  | 1723.9  | 0.072 | Agonist | 8800   | 9400   | 9100.00   | 424.3   | -1.6  |
| MCHR1   | Baseline | 1240.00   | 205.1   | 0.165 | Max | 7620.00   | 311.1   | 0.041 | Agonist | 920    | 920    | 920.00    | 0       | -5    |

|         |          |           |        |       |     |           |         |       |         |        |        |           |         |      |
|---------|----------|-----------|--------|-------|-----|-----------|---------|-------|---------|--------|--------|-----------|---------|------|
| MCHR2   | Baseline | 8160.00   | 699.1  | 0.086 | Max | 61980.00  | 4047.2  | 0.065 | Agonist | 6080   | 6880   | 6480.00   | 565.7   | -3.1 |
| MLNR    | Baseline | 15335.00  | 1588.5 | 0.104 | Max | 119100.00 | 3901.5  | 0.033 | Agonist | 15800  | 14800  | 15300.00  | 707.1   | 0    |
| MRGPRX1 | Baseline | 129240.00 | 8157.5 | 0.063 | Max | 398066.67 | 26576.8 | 0.067 | Agonist | 119120 | 118400 | 118760.00 | 509.1   | -3.9 |
| MRGPRX2 | Baseline | 34325.00  | 3647.3 | 0.106 | Max | 138800.00 | 10423.7 | 0.075 | Agonist | 29480  | 31560  | 30520.00  | 1470.8  | -3.6 |
| MTNR1A  | Baseline | 5845.00   | 546.1  | 0.093 | Max | 21300.00  | 652     | 0.031 | Agonist | 4240   | 4600   | 4420.00   | 254.6   | -9.2 |
| NMBR    | Baseline | 10420.00  | 796    | 0.076 | Max | 185470.00 | 14493.8 | 0.078 | Agonist | 8920   | 8600   | 8760.00   | 226.3   | -0.9 |
| NMU1R   | Baseline | 8865.00   | 851.2  | 0.096 | Max | 135540.00 | 8982.5  | 0.066 | Agonist | 10240  | 9760   | 10000.00  | 339.4   | 0.9  |
| NPBWR1  | Baseline | 8833.33   | 585.4  | 0.066 | Max | 22546.67  | 2021.6  | 0.09  | Agonist | 7880   | 8280   | 8080.00   | 282.8   | -5.5 |
| NPBWR2  | Baseline | 10920.00  | 1029.8 | 0.094 | Max | 94360.00  | 6116    | 0.065 | Agonist | 8960   | 9560   | 9260.00   | 424.3   | -2   |
| NPFFR1  | Baseline | 7145.00   | 1438.4 | 0.201 | Max | 35826.67  | 2374    | 0.066 | Agonist | 5160   | 5680   | 5420.00   | 367.7   | -6   |
| NPSR1b  | Baseline | 6380.00   | 704.3  | 0.11  | Max | 58550.00  | 2734.7  | 0.047 | Agonist | 4920   | 5240   | 5080.00   | 226.3   | -2.5 |
| NPY1R   | Baseline | 21985.00  | 2480.5 | 0.113 | Max | 98830.00  | 6298.6  | 0.064 | Agonist | 19880  | 18920  | 19400.00  | 678.8   | -3.4 |
| NPY2R   | Baseline | 25340.00  | 4057.2 | 0.16  | Max | 484220.00 | 22268.9 | 0.046 | Agonist | 22600  | 23240  | 22920.00  | 452.6   | -0.5 |
| NTSR1   | Baseline | 42885.00  | 3919.1 | 0.091 | Max | 176830.00 | 13815.8 | 0.078 | Agonist | 38080  | 39560  | 38820.00  | 1046.5  | -3   |
| OPRD1   | Baseline | 14980.00  | 977.2  | 0.065 | Max | 115630.00 | 5917.3  | 0.051 | Agonist | 12760  | 13280  | 13020.00  | 367.7   | -1.9 |
| OPRK1   | Baseline | 2195.00   | 370    | 0.169 | Max | 10210.00  | 567     | 0.056 | Agonist | 1600   | 1680   | 1640.00   | 56.6    | -6.9 |
| OPRL1   | Baseline | 37770.00  | 2578.2 | 0.068 | Max | 174950.00 | 6098    | 0.035 | Agonist | 35120  | 32440  | 33780.00  | 1895    | -2.9 |
| OPRM1   | Baseline | 24835.00  | 1861.3 | 0.075 | Max | 335400.00 | 32936.3 | 0.098 | Agonist | 20680  | 22320  | 21500.00  | 1159.7  | -1.1 |
| OXER1   | Baseline | 10665.00  | 757.4  | 0.071 | Max | 39520.00  | 1018.2  | 0.026 | Agonist | 9640   | 9520   | 9580.00   | 84.8    | -3.8 |
| OXTR    | Baseline | 5510.00   | 310.4  | 0.056 | Max | 98580.00  | 2696.7  | 0.027 | Agonist | 4720   | 4720   | 4720.00   | 0       | -0.8 |
| P2RY1   | Baseline | 38020.00  | 2568.2 | 0.068 | Max | 108630.00 | 7690    | 0.071 | Agonist | 37400  | 37600  | 37500.00  | 141.4   | -0.7 |
| P2RY11  | Baseline | 5940.00   | 666.9  | 0.112 | Max | 56760.00  | 4072.9  | 0.072 | Agonist | 5120   | 5320   | 5220.00   | 141.4   | -1.4 |
| P2RY12  | Baseline | 14310.00  | 770.2  | 0.054 | Max | 128750.00 | 10019.9 | 0.078 | Agonist | 11480  | 12160  | 11820.00  | 480.8   | -2.2 |
| P2RY2   | Baseline | 56130.00  | 6387.1 | 0.114 | Max | 232700.00 | 13330.8 | 0.057 | Agonist | 71440  | 68120  | 69780.00  | 2347.6  | 7.7  |
| P2RY4   | Baseline | 54150.00  | 3440.1 | 0.064 | Max | 196280.00 | 17306.7 | 0.088 | Agonist | 56040  | 54080  | 55060.00  | 1385.9  | 0.6  |
| P2RY6   | Baseline | 55320.00  | 6618.5 | 0.12  | Max | 261990.00 | 19680.8 | 0.075 | Agonist | 116200 | 140920 | 128560.00 | 17479.7 | 35.4 |
| PPYR1   | Baseline | 4920.00   | 861.6  | 0.175 | Max | 57170.00  | 6062.4  | 0.106 | Agonist | 3920   | 3920   | 3920.00   | 0       | -1.9 |
| PRLHR   | Baseline | 1580.00   | 193.6  | 0.123 | Max | 13560.00  | 1525.6  | 0.113 | Agonist | 1360   | 1200   | 1280.00   | 113.1   | -2.5 |
| PROKR1  | Baseline | 6785.00   | 1009.6 | 0.149 | Max | 88870.00  | 8237.6  | 0.093 | Agonist | 6600   | 5520   | 6060.00   | 763.7   | -0.9 |
| PROKR2  | Baseline | 1715.00   | 204.4  | 0.119 | Max | 7350.00   | 435     | 0.059 | Agonist | 1600   | 1720   | 1660.00   | 84.8    | -1   |

|           |          |           |         |       |       |           |         |       |            |        |        |           |         |       |
|-----------|----------|-----------|---------|-------|-------|-----------|---------|-------|------------|--------|--------|-----------|---------|-------|
| PTAFR     | Baseline | 115470.00 | 12923.4 | 0.112 | Max   | 542270.00 | 23979.3 | 0.044 | Agonist    | 93160  | 92480  | 92820.00  | 480.8   | -5.3  |
| PTGER2    | Baseline | 2120.00   | 290.8   | 0.137 | Max   | 12740.00  | 835.5   | 0.066 | Agonist    | 1720   | 2080   | 1900.00   | 254.6   | -2.1  |
| PTGER3    | Baseline | 53680.00  | 5457.3  | 0.102 | Max   | 171400.00 | 13649.1 | 0.08  | Agonist    | 49680  | 53080  | 51380.00  | 2404.2  | -2    |
| PTGER4    | Baseline | 41730.00  | 4451.2  | 0.107 | Max   | 165830.00 | 10930.5 | 0.066 | Agonist    | 39760  | 41400  | 40580.00  | 1159.7  | -0.9  |
| PTGFR     | Baseline | 825.00    | 97.8    | 0.119 | Max   | 22973.33  | 2077.4  | 0.09  | Agonist    | 680    | 680    | 680.00    | 0       | -0.7  |
| PTGIR     | Baseline | 39465.00  | 3517.3  | 0.089 | Max   | 118200.00 | 5572.2  | 0.047 | Agonist    | 28160  | 28000  | 28080.00  | 113.1   | -14.5 |
| PTHR1     | Baseline | 30905.00  | 3143.3  | 0.102 | Max   | 540020.00 | 31185.1 | 0.058 | Agonist    | 28800  | 28000  | 28400.00  | 565.7   | -0.5  |
| PTHR2     | Baseline | 22515.00  | 3396.7  | 0.151 | Max   | 373170.00 | 31305.7 | 0.084 | Agonist    | 18360  | 19920  | 19140.00  | 1103.1  | -1    |
| RXFP3     | Baseline | 9040.00   | 831.7   | 0.092 | Max   | 28590.00  | 2144.5  | 0.075 | Agonist    | 7880   | 8280   | 8080.00   | 282.8   | -4.9  |
| SCTR      | Baseline | 67840.00  | 9948.8  | 0.147 | Max   | 434620.00 | 45014.2 | 0.104 | Agonist    | 62200  | 62360  | 62280.00  | 113.1   | -1.5  |
| SSTR1     | Baseline | 1390.00   | 219.9   | 0.158 | Max   | 5830.00   | 367.2   | 0.063 | Agonist    | 960    | 1200   | 1080.00   | 169.7   | -7    |
| SSTR2     | Baseline | 735.00    | 111     | 0.151 | Max   | 48690.00  | 3807    | 0.078 | Agonist    | 760    | 800    | 780.00    | 28.3    | 0.1   |
| SSTR3     | Baseline | 9940.00   | 415.7   | 0.042 | Max   | 68350.00  | 8435    | 0.123 | Agonist    | 8120   | 9520   | 8820.00   | 990     | -1.9  |
| SSTR5     | Baseline | 11330.00  | 766.1   | 0.068 | Max   | 77320.00  | 1768.8  | 0.023 | Agonist    | 10360  | 12520  | 11440.00  | 1527.4  | 0.2   |
| TACR1     | Baseline | 62555.00  | 5013.8  | 0.08  | Max   | 365010.00 | 18214.3 | 0.05  | Agonist    | 54560  | 57240  | 55900.00  | 1895    | -2.2  |
| TACR2     | Baseline | 101895.00 | 11584.7 | 0.114 | Max   | 396170.00 | 32159.9 | 0.081 | Agonist    | 111160 | 100680 | 105920.00 | 7410.5  | 1.4   |
| TACR3     | Baseline | 11800.00  | 1535.7  | 0.13  | Max   | 224430.00 | 13268.5 | 0.059 | Agonist    | 9840   | 10440  | 10140.00  | 424.3   | -0.8  |
| TBXA2R    | Baseline | 21150.00  | 1641.6  | 0.078 | Max   | 96190.00  | 8526.3  | 0.089 | Agonist    | 19080  | 22400  | 20740.00  | 2347.6  | -0.5  |
| TRHR      | Baseline | 1380.00   | 326.4   | 0.237 | Max   | 22400.00  | 487.7   | 0.022 | Agonist    | 840    | 1000   | 920.00    | 113.1   | -2.2  |
| TSHR(L)   | Baseline | 685.00    | 142.5   | 0.208 | Max   | 8220.00   | 779.4   | 0.095 | Agonist    | 520    | 560    | 540.00    | 28.3    | -1.9  |
| UTR2      | Baseline | 7365.00   | 425.7   | 0.058 | Max   | 22170.00  | 1585.4  | 0.072 | Agonist    | 5960   | 5680   | 5820.00   | 198     | -10.4 |
| VIPR1     | Baseline | 48970.00  | 6735.7  | 0.138 | Max   | 506870.00 | 31114.9 | 0.061 | Agonist    | 45000  | 46200  | 45600.00  | 848.5   | -0.7  |
| VIPR2     | Baseline | 13385.00  | 2362.1  | 0.176 | Max   | 375280.00 | 24813.8 | 0.066 | Agonist    | 11520  | 11360  | 11440.00  | 113.1   | -0.5  |
| ADCYAP1R1 | EC80     | 423837.50 | 22316.9 | 0.053 | Basal | 44205.00  | 6462.5  | 0.146 | Antagonist | 365600 | 356720 | 361160.00 | 6279.1  | 16.5  |
| ADORA3    | EC80     | 45735.00  | 1857.6  | 0.041 | Basal | 12565.00  | 922.5   | 0.073 | Antagonist | 45080  | 45720  | 45400.00  | 452.6   | 1     |
| ADRA1B    | EC80     | 335063.33 | 23114.6 | 0.069 | Basal | 57095.00  | 8248.3  | 0.144 | Antagonist | 281800 | 261040 | 271420.00 | 14679.5 | 22.9  |
| ADRA2A    | EC80     | 115402.50 | 8316.2  | 0.072 | Basal | 55520.00  | 3310.6  | 0.06  | Antagonist | 87760  | 92440  | 90100.00  | 3309.3  | 42.3  |
| ADRA2B    | EC80     | 74473.33  | 6770.4  | 0.091 | Basal | 12200.00  | 1141.2  | 0.094 | Antagonist | 71440  | 64240  | 67840.00  | 5091.2  | 10.7  |
| ADRA2C    | EC80     | 115636.67 | 10493.7 | 0.091 | Basal | 23925.00  | 1800.4  | 0.075 | Antagonist | 96240  | 89000  | 92620.00  | 5119.4  | 25.1  |
| ADRB1     | EC80     | 70425.00  | 4159.2  | 0.059 | Basal | 27220.00  | 2691.7  | 0.099 | Antagonist | 48080  | 47200  | 47640.00  | 622.2   | 52.7  |



|              |      |           |         |       |       |           |         |       |            |        |        |           |         |      |
|--------------|------|-----------|---------|-------|-------|-----------|---------|-------|------------|--------|--------|-----------|---------|------|
| ADRB2        | EC80 | 53325.00  | 3185.7  | 0.06  | Basal | 12400.00  | 3371.3  | 0.272 | Antagonist | 43840  | 42080  | 42960.00  | 1244.5  | 25.3 |
| AGTR1        | EC80 | 441076.67 | 27079.6 | 0.061 | Basal | 118730.00 | 10590   | 0.089 | Antagonist | 393480 | 338240 | 365860.00 | 39060.6 | 23.3 |
| AGTRL1       | EC80 | 244297.78 | 25384   | 0.104 | Basal | 58640.00  | 4268    | 0.073 | Antagonist | 243840 | 219360 | 231600.00 | 17310   | 6.8  |
| AVPR1A       | EC80 | 83992.50  | 5761.3  | 0.069 | Basal | 5735.00   | 545.1   | 0.095 | Antagonist | 46040  | 46000  | 46020.00  | 28.3    | 48.5 |
| AVPR1B       | EC80 | 26416.67  | 1577.4  | 0.06  | Basal | 3725.00   | 356.8   | 0.096 | Antagonist | 13280  | 13440  | 13360.00  | 113.1   | 57.5 |
| AVPR2        | EC80 | 408021.82 | 27400.5 | 0.067 | Basal | 81685.00  | 7214.9  | 0.088 | Antagonist | 370240 | 352120 | 361180.00 | 12812.8 | 14.4 |
| BDKRB1       | EC80 | 20095.00  | 864.6   | 0.043 | Basal | 3765.00   | 535.6   | 0.142 | Antagonist | 15920  | 15720  | 15820.00  | 141.4   | 26.2 |
| BDKRB2       | EC80 | 683960.00 | 47719.1 | 0.07  | Basal | 146745.00 | 13372.6 | 0.091 | Antagonist | 668520 | 609560 | 639040.00 | 41691   | 8.4  |
| BRS3         | EC80 | 189566.67 | 10867.3 | 0.057 | Basal | 59295.00  | 6518    | 0.11  | Antagonist | 169760 | 167880 | 168820.00 | 1329.4  | 15.9 |
| C3AR1        | EC80 | 201870.00 | 22608.2 | 0.112 | Basal | 7550.00   | 808.2   | 0.107 | Antagonist | 184960 | 178840 | 181900.00 | 4327.5  | 10.3 |
| C5aR1        | EC80 | 252640.00 | 17133.4 | 0.068 | Basal | 20500.00  | 1709.9  | 0.083 | Antagonist | 255160 | 243800 | 249480.00 | 8032.7  | 1.4  |
| C5L2         | EC80 | 149397.50 | 10012.6 | 0.067 | Basal | 54575.00  | 4111.8  | 0.075 | Antagonist | 127440 | 125560 | 126500.00 | 1329.4  | 24.1 |
| CALCR        | EC80 | 22533.33  | 1841.7  | 0.082 | Basal | 5560.00   | 235.2   | 0.042 | Antagonist | 21120  | 19160  | 20140.00  | 1385.9  | 14.1 |
| CALCRL-RAMP1 | EC80 | 116753.33 | 5540.3  | 0.047 | Basal | 9555.00   | 899.6   | 0.094 | Antagonist | 82200  | 84400  | 83300.00  | 1555.6  | 31.2 |
| CALCRL-RAMP2 | EC80 | 727130.00 | 40944.4 | 0.056 | Basal | 234295.00 | 21364.1 | 0.091 | Antagonist | 672400 | 647640 | 660020.00 | 17508   | 13.6 |
| CALCRL-RAMP3 | EC80 | 285527.50 | 16504.6 | 0.058 | Basal | 31140.00  | 2294.9  | 0.074 | Antagonist | 234960 | 237880 | 236420.00 | 2064.8  | 19.3 |
| CALCR-RAMP2  | EC80 | 35923.33  | 2288.2  | 0.064 | Basal | 8340.00   | 572.1   | 0.069 | Antagonist | 19560  | 19960  | 19760.00  | 282.8   | 58.6 |
| CALCR-RAMP3  | EC80 | 4780.00   | 261.7   | 0.055 | Basal | 2160.00   | 161.4   | 0.075 | Antagonist | 4760   | 4640   | 4700.00   | 84.8    | 3.1  |
| CCKAR        | EC80 | 69102.50  | 3841.4  | 0.056 | Basal | 7100.00   | 765     | 0.108 | Antagonist | 60320  | 64320  | 62320.00  | 2828.4  | 10.9 |
| CCKBR        | EC80 | 438815.00 | 32448.5 | 0.074 | Basal | 122455.00 | 7736.5  | 0.063 | Antagonist | 420520 | 392520 | 406520.00 | 19799   | 10.2 |
| CCR1         | EC80 | 344914.67 | 11659.7 | 0.034 | Basal | 202930.00 | 8381.6  | 0.041 | Antagonist | 249840 | 253400 | 251620.00 | 2517.3  | 65.7 |
| CCR10        | EC80 | 48537.14  | 3100    | 0.064 | Basal | 4335.00   | 568.9   | 0.131 | Antagonist | 36000  | 31600  | 33800.00  | 3111.3  | 33.3 |
| CCR2         | EC80 | 136494.29 | 8308.4  | 0.061 | Basal | 9035.00   | 1068.9  | 0.118 | Antagonist | 129520 | 147920 | 138720.00 | 13010.8 | -1.7 |
| CCR3         | EC80 | 61717.50  | 3680.3  | 0.06  | Basal | 22290.00  | 1084.3  | 0.049 | Antagonist | 54560  | 53720  | 54140.00  | 594     | 19.2 |
| CCR4         | EC80 | 267815.00 | 15218.2 | 0.057 | Basal | 32690.00  | 3014.9  | 0.092 | Antagonist | 117320 | 141320 | 129320.00 | 16970.6 | 58.9 |
| CCR5         | EC80 | 125094.29 | 11801.5 | 0.094 | Basal | 7015.00   | 752.6   | 0.107 | Antagonist | 104880 | 110560 | 107720.00 | 4016.4  | 14.7 |
| CCR6         | EC80 | 126082.50 | 8242.5  | 0.065 | Basal | 9725.00   | 562.2   | 0.058 | Antagonist | 56800  | 59880  | 58340.00  | 2177.9  | 58.2 |
| CCR7         | EC80 | 701982.50 | 27220.2 | 0.039 | Basal | 189910.00 | 11727.9 | 0.062 | Antagonist | 661800 | 657880 | 659840.00 | 2771.9  | 8.2  |
| CCR8         | EC80 | 119222.86 | 6359.2  | 0.053 | Basal | 3700.00   | 250.3   | 0.068 | Antagonist | 72120  | 66960  | 69540.00  | 3648.7  | 43   |

|        |      |           |         |       |       |           |         |       |            |        |        |           |         |      |
|--------|------|-----------|---------|-------|-------|-----------|---------|-------|------------|--------|--------|-----------|---------|------|
| CCR9   | EC80 | 197671.43 | 13649.6 | 0.069 | Basal | 9115.00   | 975.7   | 0.107 | Antagonist | 11520  | 10920  | 11220.00  | 424.3   | 98.9 |
| CHRM1  | EC80 | 73452.00  | 5070.3  | 0.069 | Basal | 26430.00  | 2451.9  | 0.093 | Antagonist | 57360  | 69000  | 63180.00  | 8230.7  | 21.8 |
| CHRM2  | EC80 | 97336.67  | 10757.4 | 0.111 | Basal | 17315.00  | 1261.4  | 0.073 | Antagonist | 69080  | 66800  | 67940.00  | 1612.2  | 36.7 |
| CHRM3  | EC80 | 43675.00  | 3294.8  | 0.075 | Basal | 11195.00  | 703.1   | 0.063 | Antagonist | 23320  | 25120  | 24220.00  | 1272.8  | 59.9 |
| CHRM4  | EC80 | 67905.00  | 4565.4  | 0.067 | Basal | 32840.00  | 3252.3  | 0.099 | Antagonist | 32600  | 34360  | 33480.00  | 1244.5  | 98.2 |
| CHRM5  | EC80 | 593597.50 | 28556   | 0.048 | Basal | 303653.33 | 19326.7 | 0.064 | Antagonist | 495440 | 508560 | 502000.00 | 9277.2  | 31.6 |
| CMKLR1 | EC80 | 268022.50 | 13770.7 | 0.051 | Basal | 21985.00  | 2120.8  | 0.096 | Antagonist | 217640 | 213120 | 215380.00 | 3196.1  | 21.4 |
| CNR1   | EC80 | 85346.67  | 8286    | 0.097 | Basal | 10945.00  | 1112    | 0.102 | Antagonist | 25200  | 20520  | 22860.00  | 3309.3  | 84   |
| CNR2   | EC80 | 126833.33 | 5553    | 0.044 | Basal | 61766.67  | 4825.2  | 0.078 | Antagonist | 98360  | 92120  | 95240.00  | 4412.4  | 48.6 |
| CRHR1  | EC80 | 551430.00 | 36651.1 | 0.066 | Basal | 44955.00  | 5872.2  | 0.131 | Antagonist | 554480 | 572720 | 563600.00 | 12897.6 | -2.4 |
| CRHR2  | EC80 | 352313.33 | 33963.5 | 0.096 | Basal | 12740.00  | 1642    | 0.129 | Antagonist | 337480 | 285840 | 311660.00 | 36515   | 12   |
| CRT2   | EC80 | 96196.67  | 10524.9 | 0.109 | Basal | 18700.00  | 1632.5  | 0.087 | Antagonist | 85440  | 80760  | 83100.00  | 3309.3  | 16.9 |
| CX3CR1 | EC80 | 899682.50 | 43415.8 | 0.048 | Basal | 69140.00  | 4451.7  | 0.064 | Antagonist | 611560 | 597080 | 604320.00 | 10238.9 | 35.6 |
| CXCR1  | EC80 | 134005.00 | 16012   | 0.119 | Basal | 8205.00   | 741.4   | 0.09  | Antagonist | 105640 | 123960 | 114800.00 | 12954.2 | 15.3 |
| CXCR2  | EC80 | 140962.50 | 8618.7  | 0.061 | Basal | 29110.00  | 1894    | 0.065 | Antagonist | 115760 | 120280 | 118020.00 | 3196.1  | 20.5 |
| CXCR3  | EC80 | 117768.57 | 6046.2  | 0.051 | Basal | 41190.00  | 2352.9  | 0.057 | Antagonist | 116080 | 112440 | 114260.00 | 2573.9  | 4.6  |
| CXCR4  | EC80 | 13525.00  | 743.9   | 0.055 | Basal | 5114.29   | 550.1   | 0.108 | Antagonist | 10360  | 9320   | 9840.00   | 735.4   | 43.8 |
| CXCR5  | EC80 | 71762.50  | 5395.4  | 0.075 | Basal | 16110.00  | 1095.6  | 0.068 | Antagonist | 65960  | 71920  | 68940.00  | 4214.4  | 5.1  |
| CXCR6  | EC80 | 4537.14   | 456.8   | 0.101 | Basal | 740.00    | 146.6   | 0.198 | Antagonist | 2920   | 3640   | 3280.00   | 509.1   | 33.1 |
| CXCR7  | EC80 | 116335.00 | 10927.9 | 0.094 | Basal | 21795.00  | 3058    | 0.14  | Antagonist | 110480 | 115320 | 112900.00 | 3422.4  | 3.6  |
| DRD1   | EC80 | 56463.33  | 3593    | 0.064 | Basal | 5875.00   | 902.4   | 0.154 | Antagonist | 48880  | 45240  | 47060.00  | 2573.9  | 18.6 |
| DRD2L  | EC80 | 29013.33  | 2350.5  | 0.081 | Basal | 7545.00   | 614.8   | 0.081 | Antagonist | 29240  | 27160  | 28200.00  | 1470.8  | 3.8  |
| DRD2S  | EC80 | 120920.00 | 10324.9 | 0.085 | Basal | 27370.00  | 1975.8  | 0.072 | Antagonist | 127080 | 130000 | 128540.00 | 2064.8  | -8.1 |
| DRD3   | EC80 | 90502.86  | 4357.6  | 0.048 | Basal | 34005.71  | 3509    | 0.103 | Antagonist | 89200  | 80960  | 85080.00  | 5826.6  | 9.6  |
| DRD4   | EC80 | 5220.00   | 394.7   | 0.076 | Basal | 1380.00   | 196     | 0.142 | Antagonist | 4520   | 4320   | 4420.00   | 141.4   | 20.8 |
| DRD5   | EC80 | 43350.00  | 4800.9  | 0.111 | Basal | 4255.00   | 775     | 0.182 | Antagonist | 45120  | 39480  | 42300.00  | 3988.1  | 2.7  |
| EBI2   | EC80 | 662472.50 | 42533.8 | 0.064 | Basal | 70230.00  | 4475.2  | 0.064 | Antagonist | 586000 | 525200 | 555600.00 | 42992.1 | 18   |
| EDG1   | EC80 | 79217.50  | 9644.5  | 0.122 | Basal | 6310.00   | 1078.4  | 0.171 | Antagonist | 54800  | 55360  | 55080.00  | 396     | 33.1 |
| EDG3   | EC80 | 855536.67 | 59647.2 | 0.07  | Basal | 182340.00 | 25822.2 | 0.142 | Antagonist | 726840 | 701840 | 714340.00 | 17677.7 | 21   |
| EDG4   | EC80 | 282340.00 | 16940.7 | 0.06  | Basal | 122394.29 | 7387.4  | 0.06  | Antagonist | 200200 | 184400 | 192300.00 | 11172.3 | 56.3 |

|         |      |           |         |       |       |           |         |       |            |        |        |           |         |       |
|---------|------|-----------|---------|-------|-------|-----------|---------|-------|------------|--------|--------|-----------|---------|-------|
| EDG5    | EC80 | 527976.67 | 42337.7 | 0.08  | Basal | 51375.00  | 7620.5  | 0.148 | Antagonist | 537000 | 511520 | 524260.00 | 18017.1 | 0.8   |
| EDG6    | EC80 | 101812.50 | 3600.5  | 0.035 | Basal | 51000.00  | 2494.5  | 0.049 | Antagonist | 93400  | 90320  | 91860.00  | 2177.9  | 19.6  |
| EDG7    | EC80 | 288877.50 | 20897.2 | 0.072 | Basal | 66960.00  | 4768.8  | 0.071 | Antagonist | 180560 | 225880 | 203220.00 | 32046.1 | 38.6  |
| EDNRA   | EC80 | 39845.00  | 2752.9  | 0.069 | Basal | 2710.00   | 428.6   | 0.158 | Antagonist | 26640  | 30280  | 28460.00  | 2573.9  | 30.7  |
| EDNRB   | EC80 | 77350.00  | 7746.3  | 0.1   | Basal | 6825.00   | 591     | 0.087 | Antagonist | 68640  | 53640  | 61140.00  | 10606.6 | 23    |
| F2R     | EC80 | 45786.67  | 6729.6  | 0.147 | Basal | 4345.00   | 1025.6  | 0.236 | Antagonist | 38160  | 43720  | 40940.00  | 3931.5  | 11.7  |
| F2RL1   | EC80 | 425740.00 | 25412   | 0.06  | Basal | 128160.00 | 11969.6 | 0.093 | Antagonist | 413960 | 477160 | 445560.00 | 44689.2 | -6.7  |
| F2RL3   | EC80 | 413546.67 | 8294.8  | 0.02  | Basal | 216060.00 | 14748.2 | 0.068 | Antagonist | 296880 | 296200 | 296540.00 | 480.8   | 59.2  |
| FFAR1   | EC80 | 79033.33  | 5619.9  | 0.071 | Basal | 30753.33  | 2144.2  | 0.07  | Antagonist | 57720  | 59800  | 58760.00  | 1470.8  | 42    |
| FPR1    | EC80 | 354696.67 | 23622.3 | 0.067 | Basal | 110240.00 | 10397.9 | 0.094 | Antagonist | 355160 | 377000 | 366080.00 | 15443.2 | -4.7  |
| FPRL1   | EC80 | 203580.00 | 13764.8 | 0.068 | Basal | 9565.00   | 797.6   | 0.083 | Antagonist | 202760 | 194640 | 198700.00 | 5741.7  | 2.5   |
| FSHR    | EC80 | 31733.33  | 2559.9  | 0.081 | Basal | 6605.00   | 349.6   | 0.053 | Antagonist | 22320  | 20800  | 21560.00  | 1074.8  | 40.5  |
| GALR1   | EC80 | 581826.67 | 27328.1 | 0.047 | Basal | 101090.00 | 8194.9  | 0.081 | Antagonist | 551760 | 557440 | 554600.00 | 4016.4  | 5.7   |
| GALR2   | EC80 | 170114.29 | 10817   | 0.064 | Basal | 69940.00  | 5031.9  | 0.072 | Antagonist | 135720 | 158320 | 147020.00 | 15980.6 | 23.1  |
| GCGR    | EC80 | 273747.50 | 18275.8 | 0.067 | Basal | 31025.00  | 3179.7  | 0.102 | Antagonist | 264640 | 272120 | 268380.00 | 5289.2  | 2.2   |
| GHSR    | EC80 | 170132.50 | 13767   | 0.081 | Basal | 44640.00  | 5637.3  | 0.126 | Antagonist | 138440 | 124640 | 131540.00 | 9758.1  | 30.8  |
| GIPR    | EC80 | 3466.67   | 276.4   | 0.08  | Basal | 610.00    | 124.2   | 0.204 | Antagonist | 2920   | 2680   | 2800.00   | 169.7   | 23.3  |
| GLP1R   | EC80 | 127020.00 | 7078    | 0.056 | Basal | 4890.00   | 877.6   | 0.179 | Antagonist | 55320  | 52520  | 53920.00  | 1979.9  | 59.9  |
| GLP2R   | EC80 | 65210.00  | 4474.4  | 0.069 | Basal | 7795.00   | 1195.7  | 0.153 | Antagonist | 58160  | 48880  | 53520.00  | 6562    | 20.4  |
| GPR1    | EC80 | 126495.00 | 8552.7  | 0.068 | Basal | 8530.00   | 962.3   | 0.113 | Antagonist | 105200 | 103680 | 104440.00 | 1074.8  | 18.7  |
| GPR103  | EC80 | 17221.82  | 997.5   | 0.058 | Basal | 6895.00   | 652     | 0.095 | Antagonist | 8880   | 9080   | 8980.00   | 141.4   | 79.8  |
| GPR109A | EC80 | 134956.67 | 8277.4  | 0.061 | Basal | 47385.00  | 2835.4  | 0.06  | Antagonist | 136000 | 124240 | 130120.00 | 8315.6  | 5.5   |
| GPR109B | EC80 | 290945.00 | 33154.7 | 0.114 | Basal | 56205.00  | 6041.6  | 0.107 | Antagonist | 210680 | 201960 | 206320.00 | 6166    | 36.1  |
| GPR119  | EC80 | 68782.86  | 3192.6  | 0.046 | Basal | 41866.67  | 1844.6  | 0.044 | Antagonist | 37520  | 38560  | 38040.00  | 735.4   | 114.2 |
| GPR120  | EC80 | 13500.00  | 1044.4  | 0.077 | Basal | 4545.00   | 371.5   | 0.082 | Antagonist | 5040   | 4600   | 4820.00   | 311.1   | 96.9  |
| GPR35   | EC80 | 78077.50  | 4448.8  | 0.057 | Basal | 12005.00  | 1354.8  | 0.113 | Antagonist | 61000  | 59320  | 60160.00  | 1187.9  | 27.1  |
| GPR92   | EC80 | 198810.91 | 13873.8 | 0.07  | Basal | 75171.43  | 5296.7  | 0.07  | Antagonist | 135600 | 122360 | 128980.00 | 9362.1  | 56.5  |
| GRPR    | EC80 | 103252.50 | 5607.7  | 0.054 | Basal | 4740.00   | 206.2   | 0.044 | Antagonist | 94840  | 99360  | 97100.00  | 3196.1  | 6.2   |
| HCRTR1  | EC80 | 270310.00 | 25364.6 | 0.094 | Basal | 12050.00  | 1048    | 0.087 | Antagonist | 149840 | 159080 | 154460.00 | 6533.7  | 44.9  |
| HCRTR2  | EC80 | 352413.33 | 18255.4 | 0.052 | Basal | 7010.00   | 1144.2  | 0.163 | Antagonist | 358760 | 265600 | 312180.00 | 65874.1 | 11.6  |

|         |      |           |         |       |       |           |         |       |            |        |        |           |         |       |
|---------|------|-----------|---------|-------|-------|-----------|---------|-------|------------|--------|--------|-----------|---------|-------|
| HRH1    | EC80 | 146909.09 | 14478.6 | 0.099 | Basal | 46640.00  | 1679.5  | 0.036 | Antagonist | 157400 | 130360 | 143880.00 | 19120.2 | 3     |
| HRH2    | EC80 | 28931.43  | 1672.5  | 0.058 | Basal | 10060.00  | 1442.2  | 0.143 | Antagonist | 23640  | 25120  | 24380.00  | 1046.5  | 24.1  |
| HRH3    | EC80 | 26307.50  | 1578.9  | 0.06  | Basal | 4285.00   | 237.6   | 0.055 | Antagonist | 25440  | 24960  | 25200.00  | 339.4   | 5     |
| HRH4    | EC80 | 98146.67  | 2505.5  | 0.026 | Basal | 34140.00  | 2253.3  | 0.066 | Antagonist | 75120  | 72440  | 73780.00  | 1895    | 38.1  |
| HTR1A   | EC80 | 625890.00 | 35525.3 | 0.057 | Basal | 165885.00 | 16908.1 | 0.102 | Antagonist | 583880 | 528120 | 556000.00 | 39428.3 | 15.2  |
| HTR1B   | EC80 | 101560.00 | 3314    | 0.033 | Basal | 43933.33  | 4744.1  | 0.108 | Antagonist | 78440  | 85560  | 82000.00  | 5034.6  | 33.9  |
| HTR1E   | EC80 | 12310.00  | 981     | 0.08  | Basal | 4890.00   | 178.6   | 0.037 | Antagonist | 10640  | 10000  | 10320.00  | 452.6   | 26.8  |
| HTR1F   | EC80 | 30300.00  | 1828.6  | 0.06  | Basal | 12393.33  | 737.7   | 0.06  | Antagonist | 23640  | 22040  | 22840.00  | 1131.4  | 41.7  |
| HTR2A   | EC80 | 182592.00 | 16704.8 | 0.091 | Basal | 35675.00  | 4876.3  | 0.137 | Antagonist | 56600  | 59040  | 57820.00  | 1725.3  | 84.9  |
| HTR2C   | EC80 | 134496.00 | 3643.4  | 0.027 | Basal | 73137.14  | 5732.4  | 0.078 | Antagonist | 77040  | 70320  | 73680.00  | 4751.8  | 99.1  |
| HTR5A   | EC80 | 200608.57 | 13854.9 | 0.069 | Basal | 64380.00  | 7510.7  | 0.117 | Antagonist | 136640 | 140320 | 138480.00 | 2602.2  | 45.6  |
| KISS1R  | EC80 | 25145.00  | 1071.2  | 0.043 | Basal | 4855.00   | 505.9   | 0.104 | Antagonist | 18200  | 19320  | 18760.00  | 792     | 31.5  |
| LHCGR   | EC80 | 6504.00   | 519.9   | 0.08  | Basal | 1315.00   | 308.7   | 0.235 | Antagonist | 3440   | 3720   | 3580.00   | 198     | 56.3  |
| LTB4R   | EC80 | 122916.67 | 8532.9  | 0.069 | Basal | 16025.00  | 2338.9  | 0.146 | Antagonist | 123120 | 112800 | 117960.00 | 7297.3  | 4.6   |
| MC1R    | EC80 | 4008.89   | 301.8   | 0.075 | Basal | 1360.00   | 130     | 0.096 | Antagonist | 3920   | 3560   | 3740.00   | 254.6   | 10.2  |
| MC3R    | EC80 | 7412.50   | 415.4   | 0.056 | Basal | 1345.00   | 171     | 0.127 | Antagonist | 5760   | 6680   | 6220.00   | 650.5   | 19.7  |
| MC4R    | EC80 | 22310.00  | 1191.2  | 0.053 | Basal | 4540.00   | 380.7   | 0.084 | Antagonist | 14520  | 12640  | 13580.00  | 1329.4  | 49.1  |
| MC5R    | EC80 | 19891.43  | 1070.6  | 0.054 | Basal | 9760.00   | 378.6   | 0.039 | Antagonist | 16320  | 15400  | 15860.00  | 650.5   | 39.8  |
| MCHR1   | EC80 | 4094.55   | 365.8   | 0.089 | Basal | 1065.00   | 120.8   | 0.113 | Antagonist | 3680   | 3520   | 3600.00   | 113.1   | 16.3  |
| MCHR2   | EC80 | 48872.50  | 3441.3  | 0.07  | Basal | 8080.00   | 528.1   | 0.065 | Antagonist | 38320  | 42000  | 40160.00  | 2602.2  | 21.4  |
| MLNR    | EC80 | 102612.50 | 5553.2  | 0.054 | Basal | 15075.00  | 567.5   | 0.038 | Antagonist | 55520  | 56720  | 56120.00  | 848.5   | 53.1  |
| MRGPRX1 | EC80 | 256573.33 | 17427.5 | 0.068 | Basal | 122771.43 | 8004.4  | 0.065 | Antagonist | 285440 | 284640 | 285040.00 | 565.7   | -21.3 |
| MRGPRX2 | EC80 | 94786.67  | 4840.2  | 0.051 | Basal | 30545.00  | 3060    | 0.1   | Antagonist | 56600  | 49840  | 53220.00  | 4780    | 64.7  |
| MTNR1A  | EC80 | 15083.33  | 988.7   | 0.066 | Basal | 5260.00   | 297.8   | 0.057 | Antagonist | 13240  | 12960  | 13100.00  | 198     | 20.2  |
| NMBR    | EC80 | 144760.00 | 9565.5  | 0.066 | Basal | 10025.00  | 1086.2  | 0.108 | Antagonist | 84400  | 98240  | 91320.00  | 9786.4  | 39.7  |
| NMU1R   | EC80 | 116912.50 | 9622.9  | 0.082 | Basal | 8410.00   | 761     | 0.09  | Antagonist | 80880  | 87720  | 84300.00  | 4836.6  | 30.1  |
| NPBWR1  | EC80 | 18546.67  | 986.2   | 0.053 | Basal | 8154.29   | 345.2   | 0.042 | Antagonist | 19200  | 20400  | 19800.00  | 848.5   | -12.1 |
| NPBWR2  | EC80 | 80557.50  | 3752    | 0.047 | Basal | 9270.00   | 1004.8  | 0.108 | Antagonist | 68160  | 73400  | 70780.00  | 3705.2  | 13.7  |
| NPFFR1  | EC80 | 19692.00  | 1431.6  | 0.073 | Basal | 6606.67   | 686     | 0.104 | Antagonist | 17000  | 15080  | 16040.00  | 1357.6  | 27.9  |
| NPSR1b  | EC80 | 41362.50  | 2971.2  | 0.072 | Basal | 6475.00   | 698.2   | 0.108 | Antagonist | 6080   | 5840   | 5960.00   | 169.7   | 101.5 |

|        |      |           |         |       |       |           |         |       |            |        |        |           |         |      |
|--------|------|-----------|---------|-------|-------|-----------|---------|-------|------------|--------|--------|-----------|---------|------|
| NPY1R  | EC80 | 76812.50  | 5288.8  | 0.069 | Basal | 18835.00  | 1287    | 0.068 | Antagonist | 74280  | 75400  | 74840.00  | 792     | 3.4  |
| NPY2R  | EC80 | 414473.33 | 30920.8 | 0.075 | Basal | 23865.00  | 1752.2  | 0.073 | Antagonist | 412160 | 412880 | 412520.00 | 509.1   | 0.5  |
| NTSR1  | EC80 | 143746.67 | 7587.3  | 0.053 | Basal | 44875.00  | 4524.5  | 0.101 | Antagonist | 124400 | 125920 | 125160.00 | 1074.8  | 18.8 |
| OPRD1  | EC80 | 78717.50  | 5825.8  | 0.074 | Basal | 14265.00  | 1372.7  | 0.096 | Antagonist | 72320  | 75880  | 74100.00  | 2517.3  | 7.2  |
| OPRK1  | EC80 | 7227.50   | 456.5   | 0.063 | Basal | 2010.00   | 201.4   | 0.1   | Antagonist | 5920   | 6440   | 6180.00   | 367.7   | 20.1 |
| OPRL1  | EC80 | 155233.33 | 13580.8 | 0.087 | Basal | 32410.00  | 3867.7  | 0.119 | Antagonist | 149480 | 147760 | 148620.00 | 1216.2  | 5.4  |
| OPRM1  | EC80 | 252777.50 | 18791.6 | 0.074 | Basal | 23360.00  | 1591.8  | 0.068 | Antagonist | 270880 | 239240 | 255060.00 | 22372.9 | -1   |
| OXER1  | EC80 | 27008.00  | 2305.1  | 0.085 | Basal | 9925.00   | 1016.3  | 0.102 | Antagonist | 21840  | 26000  | 23920.00  | 2941.6  | 18.1 |
| OXTR   | EC80 | 75317.50  | 7372.1  | 0.098 | Basal | 5280.00   | 236.2   | 0.045 | Antagonist | 47400  | 55360  | 51380.00  | 5628.6  | 34.2 |
| P2RY1  | EC80 | 82880.00  | 5677    | 0.068 | Basal | 34880.00  | 2196.3  | 0.063 | Antagonist | 85440  | 75040  | 80240.00  | 7353.9  | 5.5  |
| P2RY11 | EC80 | 49650.00  | 4713.8  | 0.095 | Basal | 5495.00   | 850.9   | 0.155 | Antagonist | 47480  | 44560  | 46020.00  | 2064.8  | 8.2  |
| P2RY12 | EC80 | 77036.67  | 6270.9  | 0.081 | Basal | 17190.00  | 2571.7  | 0.15  | Antagonist | 80160  | 72280  | 76220.00  | 5572    | 1.4  |
| P2RY2  | EC80 | 247240.00 | 7868.1  | 0.032 | Basal | 63825.00  | 2070.8  | 0.032 | Antagonist | 248480 | 249920 | 249200.00 | 1018.2  | -1.1 |
| P2RY4  | EC80 | 141303.33 | 6631.2  | 0.047 | Basal | 49380.00  | 2972    | 0.06  | Antagonist | 84280  | 71840  | 78060.00  | 8796.4  | 68.8 |
| P2RY6  | EC80 | 241502.50 | 14517.2 | 0.06  | Basal | 67900.00  | 14348.5 | 0.211 | Antagonist | 229120 | 249800 | 239460.00 | 14623   | 1.2  |
| PPYR1  | EC80 | 53132.50  | 2678.2  | 0.05  | Basal | 4905.00   | 745.9   | 0.152 | Antagonist | 29800  | 27560  | 28680.00  | 1583.9  | 50.7 |
| PRLHR  | EC80 | 9912.50   | 1022.5  | 0.103 | Basal | 1470.00   | 202.6   | 0.138 | Antagonist | 6680   | 5280   | 5980.00   | 990     | 46.6 |
| PROKR1 | EC80 | 67127.50  | 4899.8  | 0.073 | Basal | 6805.00   | 498.9   | 0.073 | Antagonist | 42960  | 45880  | 44420.00  | 2064.8  | 37.6 |
| PROKR2 | EC80 | 7217.50   | 471.5   | 0.065 | Basal | 1595.00   | 105.7   | 0.066 | Antagonist | 5880   | 5120   | 5500.00   | 537.4   | 30.5 |
| PTAFR  | EC80 | 448823.33 | 24786   | 0.055 | Basal | 102290.00 | 10183.8 | 0.1   | Antagonist | 409200 | 389680 | 399440.00 | 13802.7 | 14.3 |
| PTGER2 | EC80 | 10680.00  | 973.2   | 0.091 | Basal | 1995.00   | 233.7   | 0.117 | Antagonist | 10920  | 9680   | 10300.00  | 876.8   | 4.4  |
| PTGER3 | EC80 | 131887.50 | 6704.5  | 0.051 | Basal | 47590.00  | 1970.6  | 0.041 | Antagonist | 133560 | 152200 | 142880.00 | 13180.5 | -13  |
| PTGER4 | EC80 | 134923.33 | 9982.5  | 0.074 | Basal | 37895.00  | 2004.2  | 0.053 | Antagonist | 102880 | 96120  | 99500.00  | 4780    | 36.5 |
| PTGFR  | EC80 | 16882.50  | 1141.9  | 0.068 | Basal | 830.00    | 186.1   | 0.224 | Antagonist | 9560   | 10360  | 9960.00   | 565.7   | 43.1 |
| PTGIR  | EC80 | 83133.33  | 5307.3  | 0.064 | Basal | 33020.00  | 2374.2  | 0.072 | Antagonist | 50120  | 55840  | 52980.00  | 4044.6  | 60.2 |
| PTHR1  | EC80 | 492882.50 | 21421.8 | 0.043 | Basal | 29490.00  | 2194.1  | 0.074 | Antagonist | 394120 | 429040 | 411580.00 | 24692.2 | 17.5 |
| PTHR2  | EC80 | 319283.33 | 22348.8 | 0.07  | Basal | 20530.00  | 2002.7  | 0.098 | Antagonist | 228040 | 229040 | 228540.00 | 707.1   | 30.4 |
| RXFP3  | EC80 | 25547.69  | 1344    | 0.053 | Basal | 8675.00   | 1471.6  | 0.17  | Antagonist | 20840  | 19200  | 20020.00  | 1159.7  | 32.8 |
| SCTR   | EC80 | 449982.50 | 23102   | 0.051 | Basal | 72850.00  | 5777.5  | 0.079 | Antagonist | 371480 | 401240 | 386360.00 | 21043.5 | 16.9 |
| SSTR1  | EC80 | 4366.15   | 254     | 0.058 | Basal | 1205.00   | 248.8   | 0.206 | Antagonist | 2880   | 3440   | 3160.00   | 396     | 38.2 |

|         |      |           |         |       |       |          |        |       |            |        |        |           |         |      |
|---------|------|-----------|---------|-------|-------|----------|--------|-------|------------|--------|--------|-----------|---------|------|
| SSTR2   | EC80 | 30282.50  | 2545.1  | 0.084 | Basal | 910.00   | 79.3   | 0.087 | Antagonist | 31160  | 29440  | 30300.00  | 1216.2  | -0.1 |
| SSTR3   | EC80 | 53875.00  | 3870.1  | 0.072 | Basal | 9565.00  | 963.2  | 0.101 | Antagonist | 34560  | 36560  | 35560.00  | 1414.2  | 41.3 |
| SSTR5   | EC80 | 64290.00  | 5738    | 0.089 | Basal | 10955.00 | 865.2  | 0.079 | Antagonist | 63520  | 62480  | 63000.00  | 735.4   | 2.4  |
| TACR1   | EC80 | 329806.67 | 23223   | 0.07  | Basal | 57515.00 | 4295   | 0.075 | Antagonist | 336200 | 320600 | 328400.00 | 11030.9 | 0.5  |
| TACR2   | EC80 | 297392.50 | 19064.6 | 0.064 | Basal | 95200.00 | 5660.5 | 0.059 | Antagonist | 183600 | 171240 | 177420.00 | 8739.8  | 59.3 |
| TACR3   | EC80 | 174465.00 | 8136.6  | 0.047 | Basal | 11005.00 | 884    | 0.08  | Antagonist | 142200 | 156960 | 149580.00 | 10436.9 | 15.2 |
| TBXA2R  | EC80 | 88775.00  | 9070    | 0.102 | Basal | 21575.00 | 1586.4 | 0.074 | Antagonist | 90800  | 92680  | 91740.00  | 1329.4  | -4.4 |
| TRHR    | EC80 | 18463.33  | 2122.8  | 0.115 | Basal | 1240.00  | 157.1  | 0.127 | Antagonist | 11680  | 10520  | 11100.00  | 820.2   | 42.8 |
| TSHR(L) | EC80 | 7243.33   | 810.6   | 0.112 | Basal | 645.00   | 125.5  | 0.195 | Antagonist | 7480   | 6000   | 6740.00   | 1046.5  | 7.6  |
| UTR2    | EC80 | 16910.00  | 1158.4  | 0.069 | Basal | 6695.00  | 489.4  | 0.073 | Antagonist | 15400  | 14800  | 15100.00  | 424.3   | 17.7 |
| VIPR1   | EC80 | 510297.50 | 27525.9 | 0.054 | Basal | 52490.00 | 1652.2 | 0.031 | Antagonist | 514480 | 532800 | 523640.00 | 12954.2 | -2.9 |
| VIPR2   | EC80 | 356452.50 | 21961.6 | 0.062 | Basal | 14115.00 | 1306.9 | 0.093 | Antagonist | 349080 | 332200 | 340640.00 | 11936   | 4.6  |

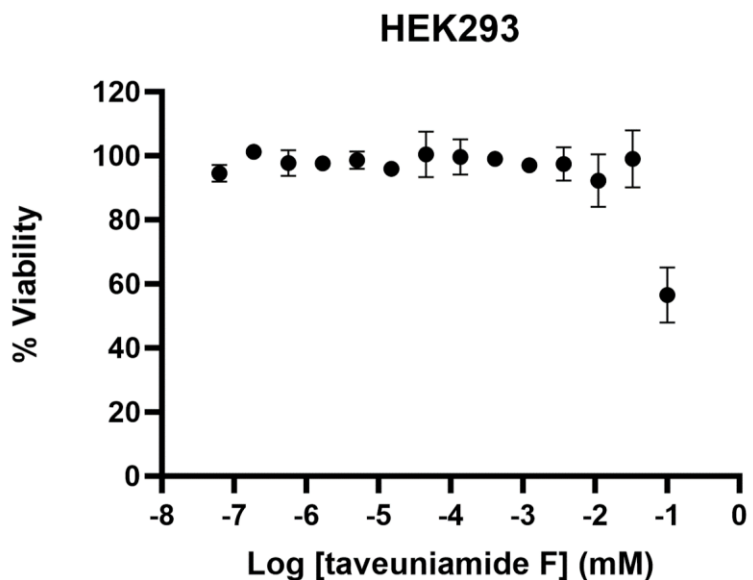

**Figure S26.** Cell viability assay of taveuniamide F using HEK293 cells. The experiment was done as technical triplicates. Data are presented as mean  $\pm$  SD (n=3).

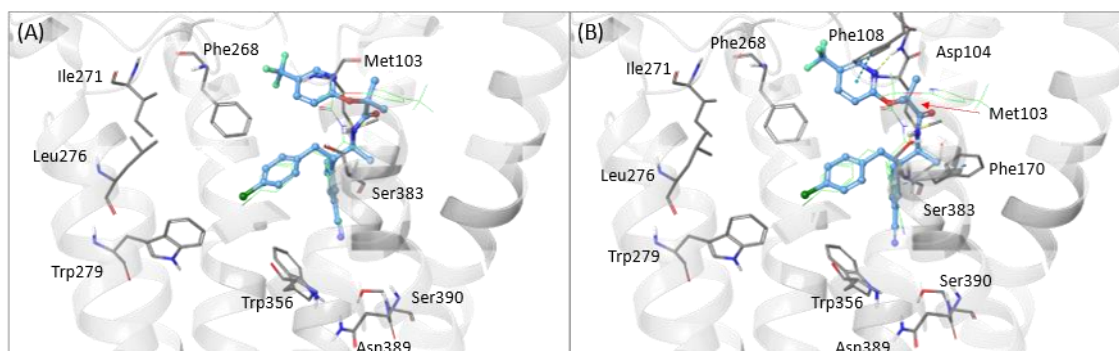

**Figure S27.** Docking poses obtained for taranabant. (A) Glide SP; (B) Induced Fit Docking with GlideSP precision. The determined crystal pose of taranabant (PDBID: 5U09) is overlaid in green lines.

### Supplementary References

- (1) Williamson, T. S., Inder., Gerwick, W. Taveuniamides: new chlorinated toxins from a mixed assemblage of marine cyanobacteria. *Tetrahedron* **2004**, 60 (33), 7025-7033.
- (2) Orsini, M. A.; Pannell, L. K.; Erickson, K. L. Polychlorinated acetamides from the cyanobacterium *Microcoleus lyngbyaceus*. *J Nat Prod* **2001**, 64 (5), 572-577.
